# Supplementary material for: Vegetable and Fruit Intake Variety and Cardiovascular Health and Mortality: A Systematic Review and Meta-Analysis of Observational Studies
Source: MDPI journal article supplement (doi:10.3390/nu15234913), 2023-11-24
Supplement: s1 [file s1]

## Online Supplemental Material

Re: Nishi et al. Variety of Vegetable and Fruit Intake in Association with Cardiovascular Health and All-Cause Mortality: A Systematic Review and Meta-Analysis of Observational Studies

### Table of Contents

|                                                                                                                                                                                                                 |           |
|-----------------------------------------------------------------------------------------------------------------------------------------------------------------------------------------------------------------|-----------|
| <b>Supplemental Tables.....</b>                                                                                                                                                                                 | <b>4</b>  |
| Supplemental Table S1: PRISMA 2020 Checklist .....                                                                                                                                                              | 4         |
| Supplemental Table S2: MOOSE (Meta-analyses of Observational Studies in Epidemiology) Checklist .....                                                                                                           | 7         |
| Supplemental Table S3: PECOTS framework of the search strategy.....                                                                                                                                             | 9         |
| Supplemental Table S4: Search strategy.....                                                                                                                                                                     | 10        |
| Supplemental Table S5. Characteristics of included cross-sectional studies. ....                                                                                                                                | 11        |
| Supplemental Table S6. Characteristics of included prospective cohort studies.....                                                                                                                              | 13        |
| Supplemental Table S7. Variety of vegetable and fruit intake assessment methods.....                                                                                                                            | 15        |
| Supplemental Table S8. Confounding variables of included cross-sectional studies.....                                                                                                                           | 22        |
| Supplemental Table S9. Confounding variables of included prospective cohort studies.....                                                                                                                        | 23        |
| Supplemental Table S10. Risk of bias scores of included observational cohort studies .....                                                                                                                      | 25        |
| Supplemental Table S10a. Study Quality Assessment Tool for Observational Cohort and Cross-sectional Studies from the National Heart, Lung, and Blood Institute scores of included cross-sectional studies ..... | 25        |
| Supplemental Table S10b. Newcastle-Ottawa Scale (NOS) scores of included prospective cohort studies .....                                                                                                       | 26        |
| Supplemental Table S11. GRADE assessment.....                                                                                                                                                                   | 27        |
| <b>Supplementary Figures .....</b>                                                                                                                                                                              | <b>31</b> |
| Supplemental Figure S1. Forest plot of prospective cohort studies of the association between variety of vegetable and/or fruit intake and all-cause mortality. ....                                             | 31        |
| Supplemental Figure S2. Forest plot of prospective cohort studies of the association between variety of vegetable and/or fruit intake and CVD mortality. ....                                                   | 31        |
| Supplemental Figure S3. Forest plot of prospective cohort studies of the association between variety of vegetable and/or fruit intake and CHD mortality. ....                                                   | 32        |
| Supplemental Figure S4. Forest plot of prospective cohort studies of the association between variety of vegetable and/or fruit intake and CHD incidence. ....                                                   | 32        |
| Supplemental Figure S5. Forest plot of prospective cohort studies of the association between variety of vegetable and/or fruit intake and stroke incidence. ....                                                | 33        |
| Supplemental Figure S6. Forest plot of cross-sectional cohort studies of the association between variety of vegetable and/or fruit intake and CVD prevalence. ....                                              | 33        |

|                                                                                                                                                                           |    |
|---------------------------------------------------------------------------------------------------------------------------------------------------------------------------|----|
| Supplemental Figure S7. Forest plot of cross-sectional cohort studies of the association between variety of vegetable and/or fruit intake and CHD prevalence. ....        | 34 |
| Supplemental Figure S8. Forest plot of cross-sectional cohort studies of the association between variety of vegetable and/or fruit intake and stroke prevalence.....      | 34 |
| Supplemental Figure S9. Forest plot of prospective cohort studies of the association between variety of vegetable and/or fruit intake and hypercholesterolemia.....       | 35 |
| Supplemental Figure S10. Forest plot of prospective cohort studies of the association between variety of vegetable and/or fruit intake and high LDL-C. ....               | 35 |
| Supplemental Figure S11. Forest plot of prospective cohort studies of the association between variety of vegetable and/or fruit intake and LDL-C. ....                    | 36 |
| Supplemental Figure S12. Forest plot of prospective cohort studies of the association between variety of vegetable and/or fruit intake and low HDL-C.....                 | 36 |
| Supplemental Figure S13. Forest plot of prospective cohort studies of the association between variety of vegetable and/or fruit intake and HDL-C.....                     | 37 |
| Supplemental Figure S14. Forest plot of prospective cohort studies of the association between variety of vegetable and/or fruit intake and hypertriglyceridemia.....      | 37 |
| Supplemental Figure S15. Forest plot of prospective cohort studies of the association between variety of vegetable and/or fruit intake and triglycerides. ....            | 38 |
| Supplemental Figure S16. Forest plot of cross-sectional cohort studies of the association between variety of vegetable and/or fruit intake and hypertension. ....         | 38 |
| Supplemental Figure S17. Forest plot of prospective cohort studies of the association between variety of vegetable and/or fruit intake and systolic blood pressure. ....  | 39 |
| Supplemental Figure S18. Forest plot of prospective cohort studies of the association between variety of vegetable and/or fruit intake and diastolic blood pressure. .... | 39 |
| Supplemental Figure S19. Forest plot of cross-sectional studies of the association between variety of vegetable and/or fruit intake and obesity.....                      | 40 |
| Supplemental Figure S20. Forest plot of prospective cohort studies of the association between variety of vegetable and/or fruit intake and body weight. ....              | 40 |
| Supplemental Figure S21. Forest plot of prospective cohort studies of the association between variety of vegetable and/or fruit intake and waist circumference.....       | 41 |
| Supplemental Figure S22. Forest plot of prospective cohort studies of the association between variety of vegetable and/or fruit intake and C-reactive protein. ....       | 41 |
| Supplemental Figure S23. Forest plot of cross-sectional studies of the association between variety of vegetable and/or fruit intake and diabetes. ....                    | 42 |
| Supplemental Figure S24. Forest plot of prospective cohort studies of the association between variety of vegetable and/or fruit intake and fasting glucose. ....          | 42 |
| Supplemental Figure S25. Forest plot of prospective cohort studies of the association between variety of vegetable and/or fruit intake and hemoglobin A1c. ....           | 43 |
| Supplemental Figure S26. Forest plot of prospective cohort studies of the association between variety of vegetable and/or fruit intake and CCMR.....                      | 43 |

|                                                                                                                                                                                                                               |           |
|-------------------------------------------------------------------------------------------------------------------------------------------------------------------------------------------------------------------------------|-----------|
| Supplemental Figure S27. Forest plot of prospective cohort studies of the association between variety of vegetable and/or fruit intake and Framingham Risk Score. ....                                                        | 44        |
| Supplemental Figure S28. Sensitivity analysis of the systematic removal of each cohort for the association between variety of vegetable and/or fruit intake and all-cause mortality in prospective cohorts. ....              | 44        |
| Supplemental Figure S29. Sensitivity analysis of the systematic removal of each cohort for the association between variety of vegetable and/or fruit intake and cardiovascular mortality in prospective cohorts. ....         | 45        |
| Supplemental Figure S30. Sensitivity analysis of the systematic removal of each cohort for the association between variety of vegetable and/or fruit intake and coronary heart disease incidence in prospective cohorts. .... | 45        |
| Supplemental Figure S31. Sensitivity analysis of the systematic removal of each cohort for the association between variety of vegetable and/or fruit intake and systolic blood pressure in prospective cohorts. ....          | 46        |
| Supplemental Figure S32. Sensitivity analysis of the systematic removal of each cohort for the association between variety of vegetable and/or fruit intake and HDL-C in prospective cohorts. ....                            | 46        |
| Supplemental Figure S33. Sensitivity analysis of the systematic removal of each cohort for the association between variety of vegetable and/or fruit intake and triglycerides in prospective cohorts. ....                    | 47        |
| Supplemental Figure S34. Sensitivity analysis of the systematic removal of each cohort for the association between variety of vegetable and/or fruit intake and waist circumference in prospective cohorts. ....              | 47        |
| Supplemental Figure S35. Sensitivity analysis of the systematic removal of each cohort for the association between variety of vegetable and/or fruit intake and diabetes in cross-sectional studies. ....                     | 48        |
| <b>References.....</b>                                                                                                                                                                                                        | <b>49</b> |

## Supplemental Tables

**Supplemental Table S1.** PRISMA 2020 Checklist.

| Section and Topic             | Item # | Checklist item                                                                                                                                                                                                                                                                                       | Location where item is reported |
|-------------------------------|--------|------------------------------------------------------------------------------------------------------------------------------------------------------------------------------------------------------------------------------------------------------------------------------------------------------|---------------------------------|
| <b>TITLE</b>                  |        |                                                                                                                                                                                                                                                                                                      |                                 |
| Title                         | 1      | Identify the report as a systematic review.                                                                                                                                                                                                                                                          | 1                               |
| <b>ABSTRACT</b>               |        |                                                                                                                                                                                                                                                                                                      |                                 |
| Abstract                      | 2      | See the PRISMA 2020 for Abstracts checklist.                                                                                                                                                                                                                                                         | 3                               |
| <b>INTRODUCTION</b>           |        |                                                                                                                                                                                                                                                                                                      |                                 |
| Rationale                     | 3      | Describe the rationale for the review in the context of existing knowledge.                                                                                                                                                                                                                          | 5-6                             |
| Objectives                    | 4      | Provide an explicit statement of the objective(s) or question(s) the review addresses.                                                                                                                                                                                                               | 6                               |
| <b>METHODS</b>                |        |                                                                                                                                                                                                                                                                                                      |                                 |
| Eligibility criteria          | 5      | Specify the inclusion and exclusion criteria for the review and how studies were grouped for the syntheses.                                                                                                                                                                                          | 6-7, Supplemental Table S3      |
| Information sources           | 6      | Specify all databases, registers, websites, organisations, reference lists and other sources searched or consulted to identify studies. Specify the date when each source was last searched or consulted.                                                                                            | 7-8                             |
| Search strategy               | 7      | Present the full search strategies for all databases, registers and websites, including any filters and limits used.                                                                                                                                                                                 | Supplemental Table S4           |
| Selection process             | 8      | Specify the methods used to decide whether a study met the inclusion criteria of the review, including how many reviewers screened each record and each report retrieved, whether they worked independently, and if applicable, details of automation tools used in the process.                     | Figure 1                        |
| Data collection process       | 9      | Specify the methods used to collect data from reports, including how many reviewers collected data from each report, whether they worked independently, any processes for obtaining or confirming data from study investigators, and if applicable, details of automation tools used in the process. | 7-8                             |
| Data items                    | 10a    | List and define all outcomes for which data were sought. Specify whether all results that were compatible with each outcome domain in each study were sought (e.g. for all measures, time points, analyses), and if not, the methods used to decide which results to collect.                        | 8-9                             |
|                               | 10b    | List and define all other variables for which data were sought (e.g. participant and intervention characteristics, funding sources). Describe any assumptions made about any missing or unclear information.                                                                                         | 7-9, Supplemental Tables 5-6    |
| Study risk of bias assessment | 11     | Specify the methods used to assess risk of bias in the included studies, including details of the tool(s) used, how many reviewers assessed each study and whether they worked independently, and if applicable, details of automation tools used in the process.                                    | 9-10                            |
| Effect measures               | 12     | Specify for each outcome the effect measure(s) (e.g. risk ratio, mean difference) used in the synthesis or presentation of results.                                                                                                                                                                  | 10-11                           |
| Synthesis methods             | 13a    | Describe the processes used to decide which studies were eligible for each synthesis (e.g. tabulating the study intervention characteristics and comparing against the planned groups for each synthesis (item #5)).                                                                                 | 8-11, Supplemental Tables 5-6   |
|                               | 13b    | Describe any methods required to prepare the data for presentation or synthesis, such as handling of missing summary statistics, or data conversions.                                                                                                                                                | 10-11                           |

| Section and Topic             | Item # | Checklist item                                                                                                                                                                                                                                                                       | Location where item is reported               |
|-------------------------------|--------|--------------------------------------------------------------------------------------------------------------------------------------------------------------------------------------------------------------------------------------------------------------------------------------|-----------------------------------------------|
|                               | 13c    | Describe any methods used to tabulate or visually display results of individual studies and syntheses.                                                                                                                                                                               | 8, Supplemental Tables 5-6                    |
|                               | 13d    | Describe any methods used to synthesize results and provide a rationale for the choice(s). If meta-analysis was performed, describe the model(s), method(s) to identify the presence and extent of statistical heterogeneity, and software package(s) used.                          | 10-11                                         |
|                               | 13e    | Describe any methods used to explore possible causes of heterogeneity among study results (e.g. subgroup analysis, meta-regression).                                                                                                                                                 | 10-11                                         |
|                               | 13f    | Describe any sensitivity analyses conducted to assess robustness of the synthesized results.                                                                                                                                                                                         | 10-11                                         |
| Reporting bias assessment     | 14     | Describe any methods used to assess risk of bias due to missing results in a synthesis (arising from reporting biases).                                                                                                                                                              | 9-10                                          |
| Certainty assessment          | 15     | Describe any methods used to assess certainty (or confidence) in the body of evidence for an outcome.                                                                                                                                                                                | 11                                            |
| <b>RESULTS</b>                |        |                                                                                                                                                                                                                                                                                      |                                               |
| Study selection               | 16a    | Describe the results of the search and selection process, from the number of records identified in the search to the number of studies included in the review, ideally using a flow diagram.                                                                                         | Figure 1                                      |
|                               | 16b    | Cite studies that might appear to meet the inclusion criteria, but which were excluded, and explain why they were excluded.                                                                                                                                                          | 11-13                                         |
| Study characteristics         | 17     | Cite each included study and present its characteristics.                                                                                                                                                                                                                            | Supplemental Tables 5-6                       |
| Risk of bias in studies       | 18     | Present assessments of risk of bias for each included study.                                                                                                                                                                                                                         | Supplemental Table S10                        |
| Results of individual studies | 19     | For all outcomes, present, for each study: (a) summary statistics for each group (where appropriate) and (b) an effect estimate and its precision (e.g. confidence/credible interval), ideally using structured tables or plots.                                                     | Figures 2-4, Supplemental Figures 1-27        |
| Results of syntheses          | 20a    | For each synthesis, briefly summarise the characteristics and risk of bias among contributing studies.                                                                                                                                                                               | 12-14                                         |
|                               | 20b    | Present results of all statistical syntheses conducted. If meta-analysis was done, present for each the summary estimate and its precision (e.g. confidence/credible interval) and measures of statistical heterogeneity. If comparing groups, describe the direction of the effect. | 13-20, Figures 2-4, Supplemental Figures 1-27 |
|                               | 20c    | Present results of all investigations of possible causes of heterogeneity among study results.                                                                                                                                                                                       | 15-21, Supplemental Figures 28-47             |
|                               | 20d    | Present results of all sensitivity analyses conducted to assess the robustness of the synthesized results.                                                                                                                                                                           | 20-21, Supplemental Figures 28-47             |
| Reporting biases              | 21     | Present assessments of risk of bias due to missing results (arising from reporting biases) for each synthesis assessed.                                                                                                                                                              | 14-15                                         |
| Certainty of evidence         | 22     | Present assessments of certainty (or confidence) in the body of evidence for each outcome assessed.                                                                                                                                                                                  | 15-21, Supplemental Table S11                 |
| <b>DISCUSSION</b>             |        |                                                                                                                                                                                                                                                                                      |                                               |

| Section and Topic                              | Item # | Checklist item                                                                                                                                                                                                                             | Location where item is reported |
|------------------------------------------------|--------|--------------------------------------------------------------------------------------------------------------------------------------------------------------------------------------------------------------------------------------------|---------------------------------|
| Discussion                                     | 23a    | Provide a general interpretation of the results in the context of other evidence.                                                                                                                                                          | 21-25                           |
|                                                | 23b    | Discuss any limitations of the evidence included in the review.                                                                                                                                                                            | 24-25                           |
|                                                | 23c    | Discuss any limitations of the review processes used.                                                                                                                                                                                      | 24-25                           |
|                                                | 23d    | Discuss implications of the results for practice, policy, and future research.                                                                                                                                                             | 22-25                           |
| <b>OTHER INFORMATION</b>                       |        |                                                                                                                                                                                                                                            |                                 |
| Registration and protocol                      | 24a    | Provide registration information for the review, including register name and registration number, or state that the review was not registered.                                                                                             | Abstract, 6                     |
|                                                | 24b    | Indicate where the review protocol can be accessed, or state that a protocol was not prepared.                                                                                                                                             | Abstract, 6                     |
|                                                | 24c    | Describe and explain any amendments to information provided at registration or in the protocol.                                                                                                                                            | NA                              |
| Support                                        | 25     | Describe sources of financial or non-financial support for the review, and the role of the funders or sponsors in the review.                                                                                                              | 26                              |
| Competing interests                            | 26     | Declare any competing interests of review authors.                                                                                                                                                                                         | 26                              |
| Availability of data, code and other materials | 27     | Report which of the following are publicly available and where they can be found: template data collection forms; data extracted from included studies; data used for all analyses; analytic code; any other materials used in the review. | 27                              |

From: Page MJ, McKenzie JE, Bossuyt PM, Boutron I, Hoffmann TC, Mulrow CD, et al. The PRISMA 2020 statement: an updated guideline for reporting systematic reviews. BMJ 2021;372:n71. doi: 10.1136/bmj.n71.

**Supplemental Table S2.** MOOSE (Meta-analyses of Observational Studies in Epidemiology) Checklist<sup>a</sup>.

| Reporting Criteria                                                                                                                         | Reported (Yes/No) | Reported on Page No.               |
|--------------------------------------------------------------------------------------------------------------------------------------------|-------------------|------------------------------------|
| <b>Reporting of Background</b>                                                                                                             |                   |                                    |
| Problem definition                                                                                                                         | Yes               | 3, 5-6                             |
| Description of Study Outcome(s)                                                                                                            | Yes               | 6-9                                |
| Type of exposure or intervention used                                                                                                      | Yes               | 6-7                                |
| Study population                                                                                                                           | Yes               | 6-7                                |
| <b>Reporting of Search Strategy</b>                                                                                                        |                   |                                    |
| Qualifications of searchers (eg, librarians and investigators)                                                                             | Yes               | 1                                  |
| Search strategy, including time period included in the synthesis and keywords                                                              | Yes               | 6-7, Supplemental Tables 3-4       |
| Effort to include all available studies, including contact with authors                                                                    | Yes               | 11                                 |
| Databases and registries searched                                                                                                          | Yes               | 7                                  |
| Search software used, name and version, including special features used (eg, explosion)                                                    | Yes               | 8                                  |
| Use of hand searching (eg, reference lists of obtained articles)                                                                           | Yes               | 7, Figure 1, Supplemental Table S3 |
| List of citations located and those excluded, including justification                                                                      | Yes               | Figure 1                           |
| Method for addressing articles published in languages other than English                                                                   | Yes               | 7                                  |
| Method of handling abstracts and unpublished studies                                                                                       | Yes               | 7, Supplemental Tables 3-4         |
| Description of any contact with authors                                                                                                    | Yes               | 8, 11                              |
| <b>Reporting of Methods</b>                                                                                                                |                   |                                    |
| Description of relevance or appropriateness of studies assembled for assessing the hypothesis to be tested                                 | Yes               | 7                                  |
| Rationale for the selection and coding of data (eg., sound clinical principles or convenience)                                             | Yes               | 7,8                                |
| Documentation of how data were classified and coded (eg., multiple raters, blinding, and interrater reliability)                           | Yes               | 7,8                                |
| Assessment of confounding (eg., comparability of cases and controls in studies were appropriate)                                           | Yes               | 7-8                                |
| <b>Reporting Criteria</b>                                                                                                                  |                   |                                    |
| Assessment of study quality, including blinding of quality assessors; stratification or regression on possible predictors of study results | Yes               | 9                                  |

|                                                                                                                                                                                                                                                                               |     |                                             |
|-------------------------------------------------------------------------------------------------------------------------------------------------------------------------------------------------------------------------------------------------------------------------------|-----|---------------------------------------------|
| Assessment of heterogeneity                                                                                                                                                                                                                                                   | Yes | 10                                          |
| Description of statistical methods (eg., complete description of fixed or random effects models, justification of whether the chosen models account for predictors of study results, dose-response models, or cumulative meta-analysis) in sufficient detail to be replicated | Yes | 9-11                                        |
| Provision of appropriate tables and graphics                                                                                                                                                                                                                                  | Yes | Table 1, Figures 1-4, Supplemental Material |
| <b>Reporting of Results</b>                                                                                                                                                                                                                                                   |     |                                             |
| Table giving descriptive information for each study included                                                                                                                                                                                                                  | Yes | Table 1, Supplemental Table S5              |
| Results of sensitivity testing (eg., subgroup analysis)                                                                                                                                                                                                                       | Yes | 20-21, Supplemental Figures 9-27            |
| Indication of statistical uncertainty of findings                                                                                                                                                                                                                             | Yes | 21, Supplemental Table S11                  |
| <b>Reporting of Discussion</b>                                                                                                                                                                                                                                                |     |                                             |
| Quantitative assessment of bias (eg., publication bias)                                                                                                                                                                                                                       | Yes | 21                                          |
| Justification for exclusion (eg., exclusion of non-English-language citations)                                                                                                                                                                                                | Yes | NA                                          |
| Assessment of quality of included studies                                                                                                                                                                                                                                     | Yes | 8, Supplemental Tables 10a-b                |
| <b>Reporting of Conclusions</b>                                                                                                                                                                                                                                               |     |                                             |
| Consideration of alternative explanations for observed results                                                                                                                                                                                                                | Yes | 21-24                                       |
| Generalization of the conclusions (ie, appropriate for the data presented and within the domain of the literature review)                                                                                                                                                     | Yes | 21-24                                       |
| Guidelines for future research                                                                                                                                                                                                                                                | Yes | 24                                          |
| Disclosure of funding source                                                                                                                                                                                                                                                  | Yes | 26                                          |

NA = Not applicable. <sup>a</sup>Stroup DF, Berlin JA, Morton SC, Olkin I, Williamson GD, Rennie D, Moher D, Becker BJ, Sipe TA, Thacker SB. Meta-analysis of observational studies in epidemiology: a proposal for reporting. Meta-analysis Of Observational Studies in Epidemiology (MOOSE) group. JAMA. 2000 Apr 19;283(15):2008-12. doi: 10.1001/jama.283.15.2008. PMID: 10789670.



Supplemental Table S3. PECOTS framework of the search strategy.

| PECOTS framework <sup>a</sup> defined in the present systematic review and meta-analysis                                                                   |                                                                   |                                                                  |                                                                                                                                                                                                                                                                                                                                                                                                |                                                                                       |                                       |
|------------------------------------------------------------------------------------------------------------------------------------------------------------|-------------------------------------------------------------------|------------------------------------------------------------------|------------------------------------------------------------------------------------------------------------------------------------------------------------------------------------------------------------------------------------------------------------------------------------------------------------------------------------------------------------------------------------------------|---------------------------------------------------------------------------------------|---------------------------------------|
| Participants                                                                                                                                               | Exposure                                                          | Comparators                                                      | Outcomes                                                                                                                                                                                                                                                                                                                                                                                       | Time/<br>Duration                                                                     | Setting/<br>Study Design              |
| Adults (≥ 18 years) of any sex, gender, and ethnicity, and free of CVD at baseline (for analysis of CVD-related incidence) otherwise of any health status. | Higher variety of vegetable and/or fruit consumption in the diet. | Lower variety of vegetable and/or fruit consumption in the diet. | <p><i>CVD risk factors:</i><br/>LDL-C<br/>HDL-C<br/>TG<br/>TC<br/>SBP<br/>DBP<br/>WC<br/>Body weight<br/>Inflammation<br/>Fasting blood glucose<br/>Risk scores</p> <p><i>CVD prevalence:</i><br/>Overall CVD<br/>CHD<br/>Stroke</p> <p><i>CVD incidence:</i><br/>Overall CVD<br/>CHD<br/>Stroke</p> <p><i>Mortality:</i><br/>CVD-related<br/>CHD-related<br/>Stroke-related<br/>All-cause</p> | Cross-sectional (one time point) or prospective cohort (at least 1 year in duration). | Setting being the general population. |

Abbreviations: CHD, coronary heart disease; CVD, cardiovascular disease; LDL-C, low-density lipoprotein-cholesterol; HDL-C, high-density lipoprotein-cholesterol; TG, triglycerides; TC, total cholesterol; SBP, systolic blood pressure; DBP, diastolic blood pressure; WC, waist circumference.

<sup>a</sup>Moher D, Shamseer L, Clarke M, Ghersi D, Liberati A, Petticrew M, Shekelle P, Stewart LA and PRISMA-P Group. Preferred reporting items for systematic review and meta-analysis protocols (PRISMA-P) 2015 statement. *Systematic Reviews* 2015; 4:1. <https://doi.org/10.1186/2046-4053-4-1>.

Supplemental Table S4. Search strategy.

| Database             | Search Period                        | Search Terms                                                                                                                                                                                                                                                                                                                                                                                                                                                                                                                                                                                                                                                                                                                                                   |
|----------------------|--------------------------------------|----------------------------------------------------------------------------------------------------------------------------------------------------------------------------------------------------------------------------------------------------------------------------------------------------------------------------------------------------------------------------------------------------------------------------------------------------------------------------------------------------------------------------------------------------------------------------------------------------------------------------------------------------------------------------------------------------------------------------------------------------------------|
| MEDLINE-PubMed       | 1946 to Mar. 21 <sup>st</sup> , 2023 | ((fruit[MeSH Terms]) OR (fruit*) OR (vegetable*) OR (vegetable[MeSH Terms])) AND (variety) AND ((coronary disease*) OR (stroke) OR (cardiovascular diseases[MeSH Terms]) OR (cardiovascular disease) OR (cholesterol) OR (cholesterol[MeSH Terms]) OR (triglycerides) OR (blood pressure) OR (body weight) OR (waist circumference) OR (body mass index) OR (blood glucose) OR (insulin resistance) OR (hemoglobin 1ac) OR (cardiovascular risk*) OR (cardiovascular morbidity) OR (cardiovascular mortality)))                                                                                                                                                                                                                                                |
| The Cochrane Library | 1946 to Mar. 21 <sup>st</sup> , 2023 | #1 MeSH descriptor: [Fruit] explode all trees<br>#2 fruit*<br>#3 vegetable*<br>#4 MeSH descriptor: [Vegetables] explode all trees<br>#5 #1 OR #2 OR #3 OR #4<br>#6 variety<br>#7 coronary disease*<br>#8 stroke<br>#9 MeSH descriptor: [Cardiovascular Diseases] explode all trees<br>#10 cardiovascular disease<br>#11 cholesterol<br>#12 triglycerides<br>#13 blood pressure<br>#14 body weight<br>#15 waist circumference<br>#16 body mass index<br>#17 blood glucose<br>#18 insulin resistance<br>#19 hemoglobin A1c<br>#20 cardiovascular risk*<br>#21 cardiovascular mortality<br>#22 cardiovascular morbidity<br>#23 #7 OR #8 OR #9 OR #10 OR #11 OR #12 OR #13 OR #14 OR #15 OR #16 OR #17 OR #18 OR #19 OR #20 OR #21 OR #22<br>#24 #5 AND #6 AND #23 |

Abbreviations: MeSH, Medical Subject Headings.

**Supplemental Table S5.** Characteristics of included cross-sectional studies.

| First Author, Journal, Year             | Study Design | Cohort           | Country | Data Collection Years | Baseline Health Status       | N     | Age, y                  | Sex (%W) | Relevant Outcomes                                                                                                                                                                                                                                                                                                                           | Outcome assessment method                                                                                      | Diet assessment method                                         | Exposure                         | Funding source    |
|-----------------------------------------|--------------|------------------|---------|-----------------------|------------------------------|-------|-------------------------|----------|---------------------------------------------------------------------------------------------------------------------------------------------------------------------------------------------------------------------------------------------------------------------------------------------------------------------------------------------|----------------------------------------------------------------------------------------------------------------|----------------------------------------------------------------|----------------------------------|-------------------|
| Azadbakht et al., Pub Health Nutr, 2006 | CS           | TLGS             | Iran    | Implemented: 1999     | No noted restrictions        | 581   | 38.6 (>18)              | 49.2%    | Obesity: (BMI $\geq 30$ kg/m <sup>2</sup> )<br>Hypercholesterolemia: (TC $\geq 6.2$ mmol/L)<br>Low HDL-C: (<1.03 mmol/L)<br>Hypertriglyceridemia: (TG $\geq 2.3$ mmol/L)<br>Diabetes: (FGB $\geq 7.0$ mmol/L or 2HPG $\geq 11.1$ mmol/L)<br>Hypertension: (SBP $\geq 140$ mm Hg or DBP $\geq 90$ mm Hg)<br>High LDL-C: ( $\geq 4.1$ mmol/L) | Height, weight, and blood pressure measured, fasting blood samples collected, 75g oral glucose tolerance test. | Validated, semi-quantitative FFQ. Trained-dietitian interview. | Vegetable variety, fruit variety | Agency            |
| Bernstein et al., J Am Diet Assoc, 2002 | CS           | FICSIT           | USA     | N/A (Prior to 1993)   | Frail nursing home residents | 98    | 87.1 $\pm$ 0.6 (72-98)  | 63%      | BMI, HDL-C, VLDL <sup>a</sup> , TG <sup>a</sup>                                                                                                                                                                                                                                                                                             | Height and weight were measured, blood samples collected.                                                      | 3-day weighted food records of 3 consecutive days of the week  | Fruit and vegetables variety     | Agency - Industry |
| Bhupathiraju et al., AJCN, 2011         | CS           | BPRHS            | USA     | Recruitment: 2000     | No noted restrictions        | 1159  | 56.9 (45-75)            | 63%      | FRS, CRP                                                                                                                                                                                                                                                                                                                                    | Height and weight were measured, blood samples collected.                                                      | Validated semiquantitative FFQ                                 | Vegetable and fruit variety      | None reported     |
| Conrad et al., Nutr J, 2018             | CS           | NHANES 1999-2014 | USA     | 1999 to 2014          | No noted restrictions        | 38981 | ~46.8 (>20)             | 52%      | CVD incidence, CHD incidence, Stroke incidence, Diabetes incidence                                                                                                                                                                                                                                                                          | Self-reported                                                                                                  | 24-h dietary recalls by trained interviewers                   | Vegetable variety                | Agency            |
| Kegler et al., BMC Public Health, 2021  | CS           | N/A              | USA     | 2015                  | No noted restrictions        | 4942  | 44.4 $\pm$ 15.4 (18-75) | 51.7%    | Overweight/Obesity                                                                                                                                                                                                                                                                                                                          | Self-reported                                                                                                  | Online survey                                                  | Vegetable and fruit variety      | Agency            |

Abbreviations: BPRHS = Boston Puerto Rican Health Study, BMI = body mass index, CHD = coronary heart disease, CRP = C-reactive protein, CS = cross-sectional, CVD = cardiovascular disease, DBP = diastolic blood pressure, FBG = fasting blood glucose, FFQ = food frequency questionnaire, FICSIT = Frailty and Injuries: Cooperative Studies of Intervention Techniques, FRS = Framingham Risk Score, HDL-C = high-density lipoprotein-cholesterol, HPFS = Health

Professionals Follow-up Study, N/A = not available, NHANES = National Health and Nutrition Examination Survey, NHS = Nurses Health Study, TC = total cholesterol, TG = triglycerides, TLGS = Tehran Lipid and Glucose Study, USA = United States of America, W = women.

<sup>a</sup>data presented as log transformed beta-coefficients and hence could not be appropriately included in the current analyses [1–4].

**Supplemental Table S6.** Characteristics of included prospective cohort studies.

| First Author, Journal, Year               | Study Design | Cohort                   | Country | Data Collection Years                                        | Duration, y                                                    | Baseline Health Status                       | N                         | Age, y                                        | Sex (% W)             | Relevant Outcomes                                 | Outcome assessment method                                                                                                                                           | Diet assessment method                       | Exposure                          | Funding source |
|-------------------------------------------|--------------|--------------------------|---------|--------------------------------------------------------------|----------------------------------------------------------------|----------------------------------------------|---------------------------|-----------------------------------------------|-----------------------|---------------------------------------------------|---------------------------------------------------------------------------------------------------------------------------------------------------------------------|----------------------------------------------|-----------------------------------|----------------|
| Bhupathiraju et al., Am J Clin Nutr, 2013 | P            | NHS & HPFS               | USA     | NHS: 1984 to 2008<br>HPFS: 1986 to 2008                      | NHS: 24 years (1984 to 2008);<br>HPFS: 22 years (1986 to 2008) | Free of cancer, diabetes, and CVD            | NHS: 71141<br>HPFS: 42135 | NHS: 50.2 (30 to 55)<br>HPFS: 53.1 (40 to 75) | NHS: 100%<br>HPFS: 0% | CHD mortality, CHD incidence                      | Medical record, autopsy report, death certificate, US postal system, state vital statistics departments, National Death Index.                                      | Validated, semi-quantitative 126-item FFQ    | Vegetable and fruit variety       | None reported  |
| Conrad et al., Nutrients, 2018            | P            | NHANES                   | USA     | NHANES: 1999 to 2010<br>Linked Mortality Files: 1999 to 2011 | 6.5 years (mean) (1999 to 2011)                                | No noted restrictions                        | 29133                     | 46.3 (95% CI: 45.8 to 46.7)                   | 52.2%                 | All-cause mortality, CVD mortality, CHD mortality | Dietary data and mortality data were linked using different institutional database: WWEIA; NCHS; NDI                                                                | 24-h dietary recalls by trained interviewers | Vegetable variety                 | Agency         |
| Kobayashi et al., Eur J Clin Nutr, 2019   | P            | JPHC study               | Japan   | 1995 to 2012                                                 | 14.9 years (median) (1995 to 2012)                             | Free of CVD and cancer                       | 79904                     | 56.3 (45-74)                                  | 53.4%                 | All-cause mortality, CVD mortality                | Death certificates. Residential registry to confirm residence status                                                                                                | Self-administered FFQ                        | Vegetable variety, fruits variety | Agency         |
| Lamb et al., Eur J Clin Nutr, 2017        | P            | ADDITION-Cambridge study | UK      | Recruitment: 2000 to 2006                                    | 5 years (Recruitment: 2001-2003)                               | Free of disease, but with high diabetes risk | 401                       | 61.4 (40-69)                                  | 43.4                  | SBP, HDL-C, TG, WC, HbA1c, CCMR                   | Anthropometric and blood pressure outcomes were measured. Blood samples collected and analyzed. CCMR calculated including: WC, blood pressure, HbA1c, TG and HDL-C. | Validated 130-item FFQ. Self-administered.   | Vegetable and fruit variety       | Agency         |

|                                              |   |                                     |             |                           |                                               |                                   |       |                                 |       |                                              |                                                                                                                                                                                                                                                                |                                                                                   |                                  |        |
|----------------------------------------------|---|-------------------------------------|-------------|---------------------------|-----------------------------------------------|-----------------------------------|-------|---------------------------------|-------|----------------------------------------------|----------------------------------------------------------------------------------------------------------------------------------------------------------------------------------------------------------------------------------------------------------------|-----------------------------------------------------------------------------------|----------------------------------|--------|
| López-González et al., Eur J Clin Nutr, 2022 | P | PREDIMED-Plus                       | Spain       | Recruitment: 2013 to 2016 | 1 year                                        | MetS and OW/OB                    | 6647  | 65.0 (Women: 60-75; Men: 55-75) | 48.4% | SBP, DBP, LDL-C, HDL-C, TG, FBG, BMI, BW, WC | Anthropometric and blood pressure outcomes were measured. Blood samples collected and analyzed. LDL-C: was calculated using the Friedewald formula.                                                                                                            | Validated, semi-quantitative 143-item FFQ. Administered by trained dietitians.    | Vegetable and fruit variety      | Agency |
| Oude Griep et al., Pub Health Nutr, 2012     | P | MORGEN Study                        | Netherlands | Baseline: 1993 to 1997    | 10 years (Baseline 1993-1997 to 2006)         | Free of CVD and diabetes          | 20069 | 41.5 (20-65)                    | 55.2% | CHD incidence, Stroke incidence              | Information was obtained from the municipal population register and the hospital discharge register (Fatal CVD: ICD-10 codes 120-125; Fatal stroke: ICD-10 codes 160-167, & 169; non-fatal stroke including transient ischaemic attack: ICD-10 codes 430-438). | Validated, semi-quantitative 178-item FFQ. Self-administered.                     | Vegetable and fruit variety      | Agency |
| Yeung et al., J Nutr Health Aging, 2021      | P | Mr. OS and Ms. OS (Hong Kong) study | China       | Baseline: 2001 to 2003    | 14-years (Recruitment 2001-2003 to 2015-2017) | Free of sarcopenia and/or frailty | 3992  | 72* (68-76)                     | 49.9% | All-cause mortality, CVD mortality           | Hong Kong Government Death Registry                                                                                                                                                                                                                            | Validated, semi-quantitative 280-item FFQ. Administered by trained research staff | Vegetable variety, Fruit variety | Agency |

Abbreviations: ADDITION = Anglo–Danish–Dutch Study of Intensive Treatment In People with Screen-Detected Diabetes in Primary Care-Cambridge study, BMI = body mass index, CHD = coronary heart disease, CVD = cardiovascular disease, DBP = diastolic blood pressure, FBG = fasting blood glucose, FFQ = food frequency questionnaire, FRS = Framingham Risk Score, HDL-C = high-density lipoprotein-cholesterol, HPFS = Health Professionals Follow-up Study, JPHC = Japan public health center study, LDL-C = low-density lipoprotein-cholesterol, MetS = metabolic syndrome, MORGEN = The Monitoring Project on Risk Factors and Chronic Diseases in the Netherlands Study, NHANES = National Health and Nutrition Examination Survey, NHS = Nurses Health Study, OB = obesity, OW = overweight, P = prospective cohort; PREDIMED-Plus = PREvención con DIeta MEDiterránea (Prevention with Mediterranean Diet)-Plus, SBP = systolic blood pressure, TG = triglycerides, UK = United Kingdom, USA = United States of America, VLDL = very low-density lipoprotein, W = women, WC = waist circumference [5–11].

**Supplemental Table S7.** Variety of vegetable and fruit intake assessment methods.

| Study                 | Variety Score Method                                                                                                                                                                                                                                                                                                                                                                                                                                                                                                                                                                                                                                                                                                                                                                                                                                                                                                                                                                                                       | Scoring Categories | Primary Components                                                                                                                                            | Cut-offs                                                                       |
|-----------------------|----------------------------------------------------------------------------------------------------------------------------------------------------------------------------------------------------------------------------------------------------------------------------------------------------------------------------------------------------------------------------------------------------------------------------------------------------------------------------------------------------------------------------------------------------------------------------------------------------------------------------------------------------------------------------------------------------------------------------------------------------------------------------------------------------------------------------------------------------------------------------------------------------------------------------------------------------------------------------------------------------------------------------|--------------------|---------------------------------------------------------------------------------------------------------------------------------------------------------------|--------------------------------------------------------------------------------|
| Azadbakht et al. 2006 | <p><i>Dietary intake measurement tool:</i> 168-item semi-quantitative FFQ</p> <p><i>Variety score:</i> Two subgroups of fruits were considered (fruit and fruit juice, berries, and citrus) and vegetables were divided into seven subgroups (vegetables, potatoes, tomatoes, starchy vegetables, legumes, yellow vegetables, green vegetables). To be counted as a ‘consumer’ for any of the food group categories, a respondent had to consume at least one-half serving, as defined by the Food Guide Pyramid quantity criteria, for one day. It did not need to be eaten all at once. Within the food groups, each of the five broad food categories received a maximum diversity score of 2 out of the 10 possible score points. For calculation of the score of each group, we divided the number of subgroups consumed by the total number of subgroups in each main group and then we multiplied this by two. Within each of the food groups, the score reflects the percentage of the possible maximum score.</p> | Quartiles          | <p>Vegetables included: potatoes, tomatoes, starchy vegetables, legumes, yellow vegetables, green vegetables.</p> <p>Fruits were not specified in detail.</p> | <p>Q1: &lt;0.8,<br/>Q2: 0.8 to &lt;1.3<br/>Q3: 1.3 to &lt;1.6<br/>Q4: ≥1.6</p> |
| Berstein et al., 2002 | <p><i>Dietary intake measurement tool:</i> 3-day weighed food records on 3 consecutive days of the week.</p> <p><i>Variety score:</i> Fruit and vegetable variety was based on the number of different fruits and vegetables consumed in the 3 days, regardless of quantity. Foods that were consumed on multiple occasions during the 3 days were counted only once.</p> <p>Variety score was coded manually, directly from the original food records. Foods were counted as they were listed on the food record.</p> <p>A food-based approach was used; therefore, items were counted as the whole foods, and foods were not broken down into their contributors--or individual ingredients, which were also listed on the food record for nutrient analysis purposes.</p>                                                                                                                                                                                                                                               | Beta coefficient   | Not specified.                                                                                                                                                | Not applicable                                                                 |

|                             |                                                                                                                                                                                                                                                                                                                                                                                                                                                            |           |                                                                                                                                                                                                                                                                                                                                                                                                                                                                                                                                                                                                                                                                                                                                                                                                                                                |                                                                                                                                                                                                                            |
|-----------------------------|------------------------------------------------------------------------------------------------------------------------------------------------------------------------------------------------------------------------------------------------------------------------------------------------------------------------------------------------------------------------------------------------------------------------------------------------------------|-----------|------------------------------------------------------------------------------------------------------------------------------------------------------------------------------------------------------------------------------------------------------------------------------------------------------------------------------------------------------------------------------------------------------------------------------------------------------------------------------------------------------------------------------------------------------------------------------------------------------------------------------------------------------------------------------------------------------------------------------------------------------------------------------------------------------------------------------------------------|----------------------------------------------------------------------------------------------------------------------------------------------------------------------------------------------------------------------------|
| Bhupathiraju & Tucker, 2011 | <p><i>Dietary intake measurement tool:</i> Semi-quantitative FFQ.</p> <p><i>Variety score:</i> Variety in fruit and vegetable intake was defined as the total number of unique fruits and vegetables consumed at least once per month over the past 12 months.</p>                                                                                                                                                                                         | Tertiles  | <p>Apples, pears, bananas, oranges, grapefruit, peaches, apricots, nectarine, plums, grapes, avocado, kiwi fruit, papaya, mangoes, prunes, cantaloupe, honeydew melon, watermelon, cherries, strawberries, blueberries, raspberries, cranberries, pineapple, olives, and 100% beets, asparagus, mushrooms, eggplant, onion, squash, cucumber, radish, celery, cilantro, garlic, parsley, zucchini, basil, and 100% vegetable juice. Starchy vegetables (including potato, plantains, tannier, and cassava), beans, and legumes (including lima beans, pinto beans, white beans, black beans, pink beans, kidney beans, fruit juice. Vegetables included lettuce, spinach, tomato, carrots, string beans, peas, corn, peppers, broccoli, cauliflower, cabbage, cowpeas, soybeans, split peas, and lentils) were excluded from the analyses.</p> | <p>Tertile 1: VF intake =17.8 (2.0-22.4)<br/>Tertile 2: 26.2 (22.4-29.7)<br/>Tertile 3: 34.0 (29.7-44.7)</p> <p>Median number of unique vegetables and fruits consumed at least once per month, ranges in parentheses.</p> |
| Bhupathiraju et al., 2013   | <p><i>Dietary intake measurement tool:</i> 126-item semi-quantitative FFQ.</p> <p><i>Variety score:</i> Variety in fruit and vegetable intake was defined as the total number of unique fruits and vegetables consumed at least once per week. To account for minor differences in the number of fruit and vegetable items assessed at each follow-up cycle, the variety score was standardized to 30 (11 for fruit score and 19 for vegetable score).</p> | Quintiles | <p>Citrus fruit, green leafy vegetables, cruciferous vegetables, and fruit and vegetables rich in b-carotene, lutein, lycopene, or vitamin C, potatoes, soy, or other legumes</p>                                                                                                                                                                                                                                                                                                                                                                                                                                                                                                                                                                                                                                                              | <p>Women (n=1984)<br/>Q1: 5.3 ±2.8<br/>Q2: 9.0±3.1<br/>Q3: 11.4±3.4<br/>Q4: 13.5±3.6<br/>Q5: 16.4±4.0</p> <p>Men (n=1986)<br/>Q1: 4.7±2.7<br/>Q2: 8.3±3.0<br/>Q3: 10.6±3.3<br/>Q4: 12.9±3.6<br/>Q5: 16.1±4.2</p>           |



|                              |                                                                                                                                                                                                                                                                                                                                                                                                                                                                                                                                                                                                                                                                                                                                                                                                                                                                                                                                                                                                                                                                                                                                                                                                                                                                                                                                                                                                                                                                                                                                                                                                                                                                                                                                                                                                                                                                                                                                                                                                |           |               |                                                                                                                      |
|------------------------------|------------------------------------------------------------------------------------------------------------------------------------------------------------------------------------------------------------------------------------------------------------------------------------------------------------------------------------------------------------------------------------------------------------------------------------------------------------------------------------------------------------------------------------------------------------------------------------------------------------------------------------------------------------------------------------------------------------------------------------------------------------------------------------------------------------------------------------------------------------------------------------------------------------------------------------------------------------------------------------------------------------------------------------------------------------------------------------------------------------------------------------------------------------------------------------------------------------------------------------------------------------------------------------------------------------------------------------------------------------------------------------------------------------------------------------------------------------------------------------------------------------------------------------------------------------------------------------------------------------------------------------------------------------------------------------------------------------------------------------------------------------------------------------------------------------------------------------------------------------------------------------------------------------------------------------------------------------------------------------------------|-----------|---------------|----------------------------------------------------------------------------------------------------------------------|
| Conrad et al., 2018 (Nutr J) | <p><i>Dietary intake measurement tool:</i> 24-h recall administered by a trained interviewer using United States Department of Agriculture's (USDA) Automated Multiple Pass Method.</p> <p><i>Variety score:</i><br/>The Healthy Food Diversity index.</p> <p>Intake data from day 1 only was used because this represents group-level intake. The index used to measure vegetable variety was based on the Healthy Food Diversity index, which measures total dietary diversity independent of amount, and penalizes consumption of foods that are discordant with user-defined consumption targets. To measure vegetable variety, we modified the index to focus exclusively on consumption of vegetables, and we used consumption targets that reflect the DGA 2015–2020 vegetable subgroup recommendations (for 2200 kcal/day) for dark green vegetables, red and orange vegetables, legumes, starchy vegetables, and other vegetables. The consumption targets of DGA 2015–2020 are in weekly units (i.e., cup-equivalents per week), so these were converted to daily units (recommended weekly consumption divided by seven) to be consistent with how intake data from WWEIA are measured.</p> <p>The equation for the index is comprised of two parts. The first part is the Berry Index, which measures the number and proportionality of vegetable subgroups reported consumed by an individual. Values are bounded by 0 and 0.8, where the minimum score represents zero vegetable intake, and the maximum score represents equal proportions of all vegetable subgroups. Finally, the Healthy Food Diversity index is computed by multiplying the Berry Index by the Health Value, which ensures that higher index scores are achieved by: 1) consumption of more vegetable subgroups, and 2) greater relative consumption of vegetable subgroups that have greater weighting. The vegetable variety score, using the Healthy Food Diversity index, is bounded by 0 and 0.64.</p> | Quintiles | Not specified | Median vegetable variety scores for each quintile are:<br>Q1: 0,<br>Q2: 0.17,<br>Q3: 0.33,<br>Q4: 0.43,<br>Q5: 0.52. |
|------------------------------|------------------------------------------------------------------------------------------------------------------------------------------------------------------------------------------------------------------------------------------------------------------------------------------------------------------------------------------------------------------------------------------------------------------------------------------------------------------------------------------------------------------------------------------------------------------------------------------------------------------------------------------------------------------------------------------------------------------------------------------------------------------------------------------------------------------------------------------------------------------------------------------------------------------------------------------------------------------------------------------------------------------------------------------------------------------------------------------------------------------------------------------------------------------------------------------------------------------------------------------------------------------------------------------------------------------------------------------------------------------------------------------------------------------------------------------------------------------------------------------------------------------------------------------------------------------------------------------------------------------------------------------------------------------------------------------------------------------------------------------------------------------------------------------------------------------------------------------------------------------------------------------------------------------------------------------------------------------------------------------------|-----------|---------------|----------------------------------------------------------------------------------------------------------------------|

|                                    |                                                                                                                                                                                                                                                                                                                                                                                                                                                                                                                                                                                                                                                                                                                                                                                                                                                                                                                                                                                                                                                                                                                                                                                                                                                                                                                                                                                                                                                                                                                                                                                                                                                                                                                                                                                                                                                 |                                                                                     |                                                                                                                                                                              |                                                                                                 |
|------------------------------------|-------------------------------------------------------------------------------------------------------------------------------------------------------------------------------------------------------------------------------------------------------------------------------------------------------------------------------------------------------------------------------------------------------------------------------------------------------------------------------------------------------------------------------------------------------------------------------------------------------------------------------------------------------------------------------------------------------------------------------------------------------------------------------------------------------------------------------------------------------------------------------------------------------------------------------------------------------------------------------------------------------------------------------------------------------------------------------------------------------------------------------------------------------------------------------------------------------------------------------------------------------------------------------------------------------------------------------------------------------------------------------------------------------------------------------------------------------------------------------------------------------------------------------------------------------------------------------------------------------------------------------------------------------------------------------------------------------------------------------------------------------------------------------------------------------------------------------------------------|-------------------------------------------------------------------------------------|------------------------------------------------------------------------------------------------------------------------------------------------------------------------------|-------------------------------------------------------------------------------------------------|
| Conrad et al., 2018<br>(Nutrients) | <p><i>Dietary intake measurement tool:</i> Trained interviewers administer 24-h dietary recalls to study participants using United States Department of Agriculture's (USDA) Automated Multiple Pass Method.</p> <p><i>Variety score:</i> Vegetable variety was measured using an index developed to measure adherence to the DGA-2015 recommendations for daily vegetable variety. The index measures the variety of vegetable intake independent of amount, and penalizes the consumption of vegetable subgroups (dark green vegetables, red and orange vegetables, legumes, starchy vegetables, and other vegetables) that do not align with recommended intake proportions in the DGA 2015–2020. The index contains two parts.</p> <p>1) The Berry Index, assesses the proportionality of vegetable subgroups that individuals report consumed. The consumption targets of DGA 2015–2020 are in weekly units (i.e., cup-equivalents per week), so to be consistent with how WWEIA data are measured, these were converted to daily units. The minimum score (0) represents zero vegetable intake, and the maximum score (0.8) represents equal proportions of all vegetable subgroups.</p> <p>2) The Health Value, gives greater weighting to vegetable subgroups that are recommended in greater proportions. The minimum score (0) represents zero vegetable intake, and the maximum score (1) represents the consumption of only the subgroups with the greatest weights. Finally, the vegetable variety index is calculated by multiplying the Berry Index by the Health Value, which affirms that higher scores are attained by (1) the consumption of a greater number of vegetable subgroups, and (2) a greater consumption of subgroups that have greater recommended consumption amounts. Index scores range from 0.0 to 0.64.</p> | Least vegetable variety, intermediate vegetable variety, greatest vegetable variety | Dark green vegetables, red and orange vegetables, legumes, starchy vegetables, and other vegetables                                                                          | Least variety: 0.00, Intermediate variety: 0.25 (0.25-0.25), Greatest variety: 0.48 (0.48-0.48) |
| Kelger et al., 2021                | <p><i>Dietary intake measurement tool:</i> survey, noted as a validated measure.</p> <p><i>Variety score:</i> An inventory of the number of fruits (out of 17 possible options) and vegetables (out of 22 possible options) consumed was calculated.</p>                                                                                                                                                                                                                                                                                                                                                                                                                                                                                                                                                                                                                                                                                                                                                                                                                                                                                                                                                                                                                                                                                                                                                                                                                                                                                                                                                                                                                                                                                                                                                                                        | Odds ratio                                                                          | Fruit (17 options, top 5 include, Apples, bananas, grapes, oranges, strawberries), and vegetables (22 options, top 5 include: onions, carrots, tomatoes, lettuce, broccoli). | Not applicable                                                                                  |

|                       |                                                                                                                                                                                                                                                                                                                                                                                                                                                                                                                                                                                                                                                                                          |                                      |                                                                       |                                                                                                                                                                                                                                                                                                                                                                              |
|-----------------------|------------------------------------------------------------------------------------------------------------------------------------------------------------------------------------------------------------------------------------------------------------------------------------------------------------------------------------------------------------------------------------------------------------------------------------------------------------------------------------------------------------------------------------------------------------------------------------------------------------------------------------------------------------------------------------------|--------------------------------------|-----------------------------------------------------------------------|------------------------------------------------------------------------------------------------------------------------------------------------------------------------------------------------------------------------------------------------------------------------------------------------------------------------------------------------------------------------------|
| Kobayashi et al. 2019 | <p><i>Dietary intake measurement tool:</i> 138-item semi-quantitative FFQ (over the preceding year)</p> <p><i>Variety score:</i> If the consumption frequency of the same food or beverage was more than once per day, it was counted as once per day. Diversity was calculated as the number of items from the list consumed per day, and diversity within vegetables (24 items), and fruit (16 items).</p>                                                                                                                                                                                                                                                                             | Quintiles                            | Vegetables (24 items) and fruit (16 items), otherwise not specified.  | <p>Men/Vegetable (median freq):<br/>Q1 (low): 1.7<br/>Q2: 3.0<br/>Q3: 4.2<br/>Q4: 5.7<br/>Q5 (high): 8.4</p> <p>Men/Fruit (median freq):<br/>Q1: 0.6<br/>Q2: 1.3<br/>Q3: 2.2<br/>Q4: 3.4<br/>Q5: 5.7</p> <p>Women/Vegetable:<br/>Q1: 2.3<br/>Q2: 3.8<br/>Q3: 5.2<br/>Q4: 6.8<br/>Q5: 9.4</p> <p>Women/Fruit:<br/>Q1: 2.0<br/>Q2: 2.1<br/>Q3: 3.3<br/>Q4: 4.7<br/>Q5: 7.1</p> |
| Lamb et al., 2017     | <p><i>Dietary intake measurement tool:</i> 130-item validated, semi-quantitative FFQ</p> <p><i>Variety score:</i> Variety of fruit and vegetable intake was derived by summing the total number of unique fruit and vegetable items consumed at least once per week. Possible variety ranged from 0 to 37 items. Potatoes were not included in the analyses, with the reasoning that they differ from vegetables in terms of energy and carbohydrate content and are commonly substituted for cereals rather than vegetables. Fruit juice, was also not included in the analyses, as it is not considered to be equivalent to whole fruit regarding fibre content and satiety value.</p> | Continuous (regression coefficients) | Potatoes and fruit juices were not included, otherwise not specified. | Not applicable.                                                                                                                                                                                                                                                                                                                                                              |

|                             |                                                                                                                                                                                                                                                                                                                                                                                                                                                                                                                                                                                                                                                                                                                                                                                                                                                                                                                                                                                                                                                                                                                                                                                                                                                                                                                                                                                                                                                                                                                                                                                                                                                                                                                                      |                               |                                                                                                                                                                                                                                                                                                                                                                                                                                                                                                                                                                                                                                                          |                                                                                                                                                                                                                                                                                                               |
|-----------------------------|--------------------------------------------------------------------------------------------------------------------------------------------------------------------------------------------------------------------------------------------------------------------------------------------------------------------------------------------------------------------------------------------------------------------------------------------------------------------------------------------------------------------------------------------------------------------------------------------------------------------------------------------------------------------------------------------------------------------------------------------------------------------------------------------------------------------------------------------------------------------------------------------------------------------------------------------------------------------------------------------------------------------------------------------------------------------------------------------------------------------------------------------------------------------------------------------------------------------------------------------------------------------------------------------------------------------------------------------------------------------------------------------------------------------------------------------------------------------------------------------------------------------------------------------------------------------------------------------------------------------------------------------------------------------------------------------------------------------------------------|-------------------------------|----------------------------------------------------------------------------------------------------------------------------------------------------------------------------------------------------------------------------------------------------------------------------------------------------------------------------------------------------------------------------------------------------------------------------------------------------------------------------------------------------------------------------------------------------------------------------------------------------------------------------------------------------------|---------------------------------------------------------------------------------------------------------------------------------------------------------------------------------------------------------------------------------------------------------------------------------------------------------------|
| López-González et al., 2022 | <p><i>Dietary intake measurement tool:</i> 143-item validated, semi-quantitative FFQ.</p> <p><i>Variety score:</i> The FFQ includes 13 and 17 items about fruit and vegetable intake, respectively. In each item, a typical portion size was defined as well as nine potential categories of fruit and vegetable frequency intake that varied from never or almost never to more than six times per day. The present study has been focused on solid and raw fruits and vegetables which are frequently consumed in Spain, so fruit and vegetable juices were excluded. Besides, as dried fruits refer to more than one type of fruit, they were also excluded because it was impossible to find out what type of raw fruit would be equivalent. Finally, potatoes and mushrooms were not considered vegetables because its nutritional composition differs from that of vegetables. Therefore, ten items of fruits such as oranges, bananas, apples, strawberries, cherries, melon, watermelon, kiwis, grapes, and peaches and eleven of vegetables including chards, cabbage, lettuce, tomatoes, carrots, green beans, courgette, peppers, asparagus, onions and garlicks were finally incorporated. Variety of fruit and vegetable intake was measured as the sum of the total number of unique items consumed, regardless of quantity, which corresponds to the at least 1–3 per month response category in the FFQ. After that, continuous scores for variety in items consumed per month of fruits (0–10), vegetables (0–11) and both (0–21) were created at baseline, six months and 1-year of follow-up. This scoring method is similar to those used for reducing the risk of several chronic diseases in other cohort.</p> | Beta-coefficient (continuous) | Solid and raw fruits and vegetables which are frequently consumed in Spain, so fruit and vegetable juices were excluded. Besides, as dried fruits refer to more than one type of fruit, they were also excluded. potatoes and mushrooms were not considered vegetables because its nutritional composition differs from that of vegetables. Therefore, ten items of fruits such as oranges, bananas, apples, strawberries, cherries, melon, watermelon, kiwis, grapes and peaches and eleven of vegetables including chards, cabbage, lettuce, tomatoes, carrots, green beans, courgette, peppers, asparagus, onions and garlicks were finally included. | <p>Variety (items/month)</p> <p>Fruits and vegetables<br/>Baseline: 15.44±3.42<br/>6months: 15.47±3.32<br/>1-year: 15.84±3.20</p> <p>Fruits<br/>Baseline: 7.71±2.26<br/>6-months: 7.43±2.32<br/>1-year: 7.77±2.20</p> <p>Vegetables<br/>Baseline: 7.73±2.04<br/>6-months: 8.04±1.95<br/>1-year: 8.07±1.93</p> |
|-----------------------------|--------------------------------------------------------------------------------------------------------------------------------------------------------------------------------------------------------------------------------------------------------------------------------------------------------------------------------------------------------------------------------------------------------------------------------------------------------------------------------------------------------------------------------------------------------------------------------------------------------------------------------------------------------------------------------------------------------------------------------------------------------------------------------------------------------------------------------------------------------------------------------------------------------------------------------------------------------------------------------------------------------------------------------------------------------------------------------------------------------------------------------------------------------------------------------------------------------------------------------------------------------------------------------------------------------------------------------------------------------------------------------------------------------------------------------------------------------------------------------------------------------------------------------------------------------------------------------------------------------------------------------------------------------------------------------------------------------------------------------------|-------------------------------|----------------------------------------------------------------------------------------------------------------------------------------------------------------------------------------------------------------------------------------------------------------------------------------------------------------------------------------------------------------------------------------------------------------------------------------------------------------------------------------------------------------------------------------------------------------------------------------------------------------------------------------------------------|---------------------------------------------------------------------------------------------------------------------------------------------------------------------------------------------------------------------------------------------------------------------------------------------------------------|

|                         |                                                                                                                                                                                                                                                                                                                                                                                                                                                                                                                                                                                                                                                                                                                                                                                                                                                                                                                                                                                                                                                                                                                                                                                                                                                                                              |          |                                                                                                                                                                                                                                                                                                                                                                                                                                                         |                                                                                                                                                                                          |
|-------------------------|----------------------------------------------------------------------------------------------------------------------------------------------------------------------------------------------------------------------------------------------------------------------------------------------------------------------------------------------------------------------------------------------------------------------------------------------------------------------------------------------------------------------------------------------------------------------------------------------------------------------------------------------------------------------------------------------------------------------------------------------------------------------------------------------------------------------------------------------------------------------------------------------------------------------------------------------------------------------------------------------------------------------------------------------------------------------------------------------------------------------------------------------------------------------------------------------------------------------------------------------------------------------------------------------|----------|---------------------------------------------------------------------------------------------------------------------------------------------------------------------------------------------------------------------------------------------------------------------------------------------------------------------------------------------------------------------------------------------------------------------------------------------------------|------------------------------------------------------------------------------------------------------------------------------------------------------------------------------------------|
| Oude Griep et al., 2012 | <p><i>Dietary intake measurement tool:</i> 178-item validated, semi-quantitative FFQ (over the preceding year)</p> <p><i>Variety score:</i> The fruit and vegetables assessed were those commonly consumed in the Netherlands. Fruit and vegetable consumption during winter and summer were assessed separately to consider seasonal variation. Fruit and vegetable juices and sauces were excluded, and potatoes and legumes were not considered as vegetables, because their nutritional value differs significantly from that of vegetables. The FFQ comprised 9 fruit items, 7 raw vegetables and 13 cooked vegetables. Each different fruit or vegetable that was consumed at least once per 2 weeks over the previous year contributed 1 point to the variety score. Several vegetable items that were essentially the same food but appeared in different forms, e.g., raw and cooked carrots, contributed only 1 point if their combined intake was at least once per 2 weeks. Several items were combined in single questions and could therefore not be distinguished from one another, i.e., apples and pears, cabbages, and leeks and onions. Variety scores ranged from 0 to 22 for fruit and vegetables together, from 0 to 9 for fruit, and from 0 to 13 for vegetables.</p> | Tertiles | Fruit (9 items), raw vegetables (7 items), cooked vegetables (13 items). Several vegetable items that were essentially the same food but appeared in different forms, e.g., raw and cooked carrots, contributed only 1 point if their combined intake was at least once per 2 weeks. Several items were combined in single questions and could therefore not be distinguished from one another, i.e., apples and pears, cabbages, and leeks and onions. | T1 (mean±SD):<br>5.7±2.0<br>T2: 10.5±1.1<br>T3: 15.3±1.9                                                                                                                                 |
| Yeung et al., 2021      | <p><i>Dietary intake measurement tool:</i> 280-item validated, semi-quantitative FFQ</p> <p><i>Variety score:</i> The FFQ includes questions for the intake of specific fruits and vegetables. Potato, sweet potato, sweet corn, Chinese water chestnut, lotus root, pumpkin, taro, and preserved vegetables were not included in the calculation of total quantity and variety of vegetable intake, as their starch and/or sodium content is very different from other vegetables. Fruit cocktail, fruit juice with added sugar and canned fruits were not included in the calculation of total quantity and variety of fruit intake, as an abundant amount of sugar is often added. One point was given for each specific type of fruits and vegetables that was consumed at least a few times per year, regardless of the quantity. The possible ranges for the summed variety scores were from 0 to 25 for fruit intake, from 0 to 46 for vegetable intake and from 0 to 71 for combined fruit and vegetable intake.</p>                                                                                                                                                                                                                                                                 | Tertiles | Not included: potato, sweet potato, sweet corn, Chinese water chestnut, lotus root, pumpkin, taro, and preserved vegetables. Fruit cocktail, fruit juice with added sugar and canned fruits were not included in the calculation of total quantity and variety of fruit.                                                                                                                                                                                | <p>Fruit variety<br/>T1: ≤6<br/>T2: 7-11<br/>T3: ≥12</p> <p>Vegetable variety<br/>T1: ≤20<br/>T2: 21-27<br/>T3: ≥28</p> <p>Combined FV Variety<br/>T1: ≤28<br/>T2: 29-37<br/>T3: ≥38</p> |

Abbreviations: DGA, Dietary Guidelines for Americans; FFQ, food frequency questionnaire; freq, frequency; FV, fruits and vegetables; Q, quantile; SD, standard deviation; T, tertile; USDA, United States Department of Agriculture.

**Supplemental Table S8.** Confounding variables of included cross-sectional studies.

| <b>Cohort</b>                                        | <b>TLGS</b>               | <b>FICSIT</b>             | <b>BPRHS</b>                 | <b>NHANES</b>                 |
|------------------------------------------------------|---------------------------|---------------------------|------------------------------|-------------------------------|
| <b>Study</b>                                         | Azadbakht et al.,<br>2006 | Bernstein et al.,<br>2002 | Bhupathiraju et al.,<br>2011 | Conrad et al.,<br>Nutr J 2018 |
| Number of variables in fully adjusted                | 14                        | 4                         | 16                           | 11                            |
| <b>Pre-specified primary confounding variable</b>    |                           |                           |                              |                               |
| Energy intake                                        | ✓                         | ✓                         | ✓                            | ✓                             |
| <b>Pre-specified secondary confounding variables</b> |                           |                           |                              |                               |
| Age                                                  | ✓                         | ✓                         | ✓                            | ✓                             |
| Sex                                                  | ✓                         | ✓                         | ✓                            | ✓                             |
| Amount of VF Intake                                  |                           |                           | ✓                            | ✓                             |
| Physical activity                                    | ✓                         |                           |                              |                               |
| Smoking                                              | ✓                         |                           | ✓                            | ✓                             |
| Baseline BMI / Body Weight / WC                      | ✓                         | ✓                         | ✓                            | ✓                             |
| <b>Other confounding variables</b>                   |                           |                           |                              |                               |
| Education                                            |                           |                           |                              | ✓                             |
| Household income                                     |                           |                           | ✓                            |                               |
| Income-to-poverty ratio                              |                           |                           |                              | ✓                             |
| Race/ethnicity                                       |                           |                           |                              | ✓                             |
| Waist-to-hip ratio                                   | ✓                         |                           |                              |                               |
| Stress                                               |                           |                           | ✓                            |                               |
| White blood cell count                               |                           |                           | ✓                            |                               |
| <b>Dietary Intake</b>                                |                           |                           |                              |                               |
| Alcohol                                              |                           |                           | ✓                            |                               |
| Sweets/desserts                                      |                           |                           |                              | ✓                             |
| Mediterranean diet adherence                         | ✓                         |                           |                              |                               |
| Trans fat                                            |                           |                           | ✓                            |                               |
| Saturated fat                                        |                           |                           | ✓                            |                               |
| Unsaturated: saturated fatty acids                   |                           |                           |                              | ✓                             |
| Fat (%)                                              | ✓                         |                           |                              |                               |
| Carbohydrate (%)                                     | ✓                         |                           |                              |                               |
| Protein (%)                                          | ✓                         |                           |                              |                               |
| Other food group/item                                | ✓                         |                           |                              |                               |
| <b>Disease History</b>                               |                           |                           |                              |                               |
| Diabetes prevalence                                  |                           |                           | ✓                            |                               |
| <b>Medications</b>                                   |                           |                           |                              |                               |
| Hormone replacement therapy use                      | ✓                         |                           |                              |                               |
| Vitamin supplement use                               |                           |                           | ✓                            |                               |
| Cardiovascular medication                            |                           |                           | ✓                            |                               |
| Diabetes medication                                  |                           |                           | ✓                            |                               |
| Blood pressure-lowering                              | ✓                         |                           |                              |                               |

Abbreviations: BPRHS = Boston Puerto Rican Health Study, BMI = body mass index, FICSIT = Frailty and Injuries: Cooperative Studies of Intervention Techniques, NHANES = National Health and Nutrition Examination Survey, TLGS = Tehran Lipid and Glucose Study, VF = vegetable/fruit, WC = waist circumference.

**Supplemental Table S9.** Confounding variables of included prospective cohort studies.

| Cohort                                               | NHS + HPFS                | NHANES         | JPHC                  | ADDITION          | PREDIMED-Plus     | MORGEN                  | Mr. OS & Ms. OS   |
|------------------------------------------------------|---------------------------|----------------|-----------------------|-------------------|-------------------|-------------------------|-------------------|
| <b>Study</b>                                         | Bhupathiraju et al., 2013 | Conrad et al., | Kobayashi et al, 2019 | Lamb et al., 2017 | López-González et | Oude Griep et al., 2012 | Yeung et al. 2021 |
| Number of variables in fully adjusted model          | 16                        | 11             | 12                    | 13                | 16                | 13                      | 17                |
| <b>Pre-specified primary confounding variable</b>    |                           |                |                       |                   |                   |                         |                   |
| Energy intake                                        | √                         | √              | √                     | √                 | √                 | √                       | √                 |
| <b>Pre-specified secondary confounding variables</b> |                           |                |                       |                   |                   |                         |                   |
| Age                                                  | √                         | √              | √                     | √                 | √                 | √                       | √                 |
| Sex                                                  |                           | √              |                       | √                 | √                 | √                       | √                 |
| Amount of VF Intake                                  |                           |                |                       | √                 |                   | √                       | √                 |
| Physical activity                                    | √                         |                | √                     | √                 | √                 |                         | √                 |
| Smoking                                              | √                         | √              | √                     | √                 | √                 | √                       | √                 |
| Baseline BMI/Body Weight/WC                          | √                         | √              | √                     |                   | √                 | √                       | √                 |
| <b>Other confounding variables</b>                   |                           |                |                       |                   |                   |                         |                   |
| Education                                            |                           | √              |                       |                   | √                 | √                       | √                 |
| Area of residence/ center                            |                           |                | √                     |                   | √                 |                         |                   |
| Employment status                                    |                           |                |                       |                   | √                 |                         |                   |
| Income-to-poverty ratio                              |                           | √              |                       |                   |                   |                         |                   |
| Occupational / socio-economic status                 |                           |                |                       | √                 |                   |                         | √                 |
| Occupation type                                      |                           |                | √                     |                   |                   |                         |                   |
| Race/ethnicity                                       |                           | √              |                       | √                 |                   |                         |                   |
| Calendar year                                        | √                         |                |                       |                   |                   |                         |                   |
| Solicitude                                           |                           |                | √                     |                   |                   |                         |                   |
| Intervention group                                   |                           |                |                       | √                 | √                 |                         |                   |
| Lives alone                                          |                           |                |                       |                   | √                 |                         | √                 |
| Marital status                                       |                           |                |                       |                   | √                 |                         | √                 |
| Menopausal status                                    | √                         |                |                       |                   |                   |                         |                   |
| CSID category                                        |                           |                |                       |                   |                   |                         | √                 |
| PASE score                                           |                           |                |                       |                   |                   |                         | √                 |
| DQI-I Score                                          |                           |                |                       |                   |                   |                         | √                 |
| <b>Dietary Intake</b>                                |                           |                |                       |                   |                   |                         |                   |
| Alcohol                                              | √                         |                | √                     | √                 | √                 | √                       | √                 |
| Whole grains                                         |                           |                |                       |                   |                   | √                       |                   |
| Cereal fiber                                         | √                         |                |                       |                   |                   |                         |                   |
| Sweets/desserts                                      |                           | √              |                       |                   |                   |                         |                   |
| Processed meats                                      |                           |                |                       |                   |                   | √                       |                   |
| Unprocessed red meats                                | √                         |                |                       |                   |                   |                         |                   |
| Seafood                                              | √                         |                |                       |                   |                   | √                       |                   |
| Trans fat                                            | √                         |                |                       |                   |                   |                         |                   |
| Unsaturated: saturated fat                           |                           | √              |                       |                   |                   |                         |                   |
| Coffee                                               |                           |                | √                     |                   |                   |                         |                   |
| Green tea                                            |                           |                | √                     |                   |                   |                         |                   |
| Other food group/item                                |                           |                | √                     |                   |                   |                         |                   |

| Study                                         | Bhupathiraju et al., 2013 | Conrad et al., | Kobayashi et al, 2019 | Lamb et al., 2017 | López-González et | Oude Griep et al., 2012 | Yeung et al. 2021 |
|-----------------------------------------------|---------------------------|----------------|-----------------------|-------------------|-------------------|-------------------------|-------------------|
| <b>Disease History</b>                        |                           |                |                       |                   |                   |                         |                   |
| Diabetes prevalence                           |                           |                |                       |                   | ✓                 |                         |                   |
| Hypertension prevalence                       |                           |                |                       |                   | ✓                 |                         |                   |
| Hypercholesterolemia prevalence               |                           |                |                       |                   | ✓                 |                         |                   |
| Family history of acute myocardial infarction | ✓                         |                |                       |                   |                   | ✓                       |                   |
| Depressive symptoms                           |                           |                |                       |                   |                   |                         | ✓                 |
| Number of chronic diseases                    |                           |                |                       |                   |                   |                         | ✓                 |
| <b>Medications</b>                            |                           |                |                       |                   |                   |                         |                   |
| Hormone replacement therapy use               | ✓                         |                |                       |                   |                   | ✓                       |                   |
| Vitamin supplement use                        | ✓                         |                |                       |                   |                   | ✓                       |                   |
| Cardiometabolic medication                    |                           | ✓              |                       |                   |                   |                         |                   |
| Aspirin use                                   | ✓                         |                |                       |                   |                   |                         |                   |
| Blood pressure-lowering                       |                           |                |                       | ✓                 |                   |                         |                   |
| Glucose-lowering medication                   |                           |                |                       | ✓                 |                   |                         |                   |
| Lipid-lowering medication                     |                           |                |                       | ✓                 |                   |                         |                   |

Abbreviations: ADDITION = Anglo–Danish–Dutch Study of Intensive Treatment In People with Screen-Detected Diabetes in Primary Care-Cambridge study, BMI = body mass index, HPFS = Health Professionals Follow-up Study, JPHC = Japan public health center study, MORGEN = The Monitoring Project on Risk Factors and Chronic Diseases in the Netherlands Study, NHANES = National Health and Nutrition Examination Survey, NHS = Nurses Health Study, PREDIMED-Plus = PREvención con DIeta MEDiterránea (Prevention with Mediterranean Diet)-Plus, VF = vegetable/fruit.



**Supplemental Table S10.** Risk of bias scores of included observational cohort studies.

**Supplemental Table S10a.** Study Quality Assessment Tool for Observational Cohort and Cross-sectional Studies from the National Heart, Lung, and Blood Institute scores of included cross-sectional studies.

| Reference<br>(Last name et al., Year) | 1. | 2. | 3. | 4. | 5. | 6. | 7. | 8. | 9. | 10. | 11. | 12. | 13. | 14. | Overall Quality<br>Rating | Total |
|---------------------------------------|----|----|----|----|----|----|----|----|----|-----|-----|-----|-----|-----|---------------------------|-------|
| Azadbakht et al., 2006                | 1  | 1  | 0  | 1  | 0  | NA | NA | 1  | 1  | NA  | 1   | 0   | NA  | 1   | Fair                      | 7     |
| Bernstein et al., 2002                | 1  | 1  | 0  | 1  | 0  | NA | NA | 0  | 1  | NA  | 1   | 0   | NA  | 1   | Fair                      | 6     |
| Bhupathiraju et al., 2011             | 1  | 1  | 1  | 1  | 0  | NA | NA | 1  | 1  | NA  | 1   | 0   | NA  | 0   | Fair                      | 7     |
| Conrad et al., 2018                   | 1  | 1  | NA | 1  | 0  | NA | NA | 1  | 1  | NA  | 0   | 0   | NA  | 1   | Fair                      | 6     |
| Kegler et al., 2021                   | 1  | 1  | 1  | 1  | 0  | NA | NA | 1  | 1  | NA  | 0   | 0   | NA  | 1   | Fair                      | 7     |

1. Was the research question or objection in this paper clearly stated?
2. Was the study population clearly specified and defined?
3. Was the participation rate of eligible persons at least 50%?
4. Were all the participants selected or recruited from the same or similar populations (including the same time period)? Were inclusion and exclusion criteria for being in the study prespecified and applied uniformly to all participants?
5. Was a sample size justification, power description, or variance and effect estimates provided?
6. For the analyses in the paper, were the exposure(s) of interest measured prior to the outcome(s) being measured?
7. Was the timeframe sufficient so that one could reasonably expect to see an association between exposure and outcome if it existed?
8. For exposures that can vary in amount or level, did the study examine different levels of the exposure as related to the outcome (e.g., categories or exposure, or exposure measured as continuous variable)?
9. Were the exposure measures (independent variables) clearly defined, valid, reliable, and implemented consistently across all study participants?
10. Was the exposure(s) assessed more than once over time?
11. Were the outcome measures (dependent variables) clearly defined, valid, reliable, and implemented consistently across all study participants?
12. Were the outcome assessors blinded to the exposure status of participants?
13. Was loss to follow-up after baseline 20% or less?
14. Were key potential confounding variables measured and adjusted statistically for their impact on the relationship between exposure(s) and outcome(s)?
15. Overall Quality Rating (Good, Fair, or Poor)

Abbreviations: NA, not available or applicable.

**Supplemental Table S10b.** Newcastle-Ottawa Scale (NOS) scores of included prospective cohort studies.

| Reference<br>(Last name<br>et al., Year) | Selection (max 4) <sup>a</sup>                 |                                                  |                              |                                                                                      | Outcome (max 3) <sup>b</sup> |                                                                    |                                           | Comparability<br>(max 2) <sup>c</sup> |                                                                       | Total <sup>d</sup> |
|------------------------------------------|------------------------------------------------|--------------------------------------------------|------------------------------|--------------------------------------------------------------------------------------|------------------------------|--------------------------------------------------------------------|-------------------------------------------|---------------------------------------|-----------------------------------------------------------------------|--------------------|
|                                          | Representativeness<br>of the exposed<br>cohort | Selection<br>of the<br>non-<br>exposed<br>cohort | Ascertainment<br>of exposure | Demonstration<br>that outcome<br>of interest was<br>not present at<br>start of study | Assessment<br>of outcome     | Was<br>follow-<br>up long<br>enough<br>for<br>outcomes<br>to occur | Adequacy<br>of follow-<br>up of<br>cohort | Study<br>controls<br>for<br>energy    | Study<br>controls<br>for pre-<br>specified<br>secondary<br>covariates |                    |
| Bhupathiraju<br>et al., 2013             | 0                                              | 1                                                | 1                            | 1                                                                                    | 1                            | 1                                                                  | 1                                         | 1                                     | 1                                                                     | 8                  |
| Conrad et al.,<br>2018                   | 1                                              | 1                                                | 1                            | 0                                                                                    | 1                            | 1                                                                  | 1                                         | 1                                     | 1                                                                     | 8                  |
| Kobayashi et<br>al, 2019                 | 1                                              | 1                                                | 1                            | 1                                                                                    | 1                            | 1                                                                  | 1                                         | 1                                     | 1                                                                     | 9                  |
| Lamb et al.,<br>2017                     | 0                                              | 1                                                | 1                            | 0                                                                                    | 1                            | 1                                                                  | 0                                         | 1                                     | 1                                                                     | 6                  |
| López-<br>González et<br>al., 2022       | 1                                              | 1                                                | 1                            | 0                                                                                    | 1                            | 1                                                                  | 1                                         | 1                                     | 1                                                                     | 8                  |
| Oude Griep et<br>al., 2012               | 1                                              | 1                                                | 1                            | 1                                                                                    | 1                            | 1                                                                  | 1                                         | 1                                     | 1                                                                     | 9                  |
| Yeung et al.<br>2021                     | 1                                              | 1                                                | 1                            | 1                                                                                    | 1                            | 1                                                                  | 0                                         | 1                                     | 1                                                                     | 8                  |

<sup>a</sup>Maximum 4 points awarded for cohort representativeness, selection of non-exposed cohort, exposure assessment, and demonstration that the outcome is not present at baseline

<sup>b</sup>Maximum 3 points awarded for follow-up length, adequacy of follow-up, and outcome assessment

<sup>c</sup>Maximum 2 points awarded for controlling for the pre-specified primary confounding variable (energy intake) and 4 of the 6 secondary (age, sex, amount of vegetable and/or fruit intake, physical activity, smoking status, baseline BMI or body weight) confounding variables

<sup>d</sup>A maximum of 9 points could be awarded. Cohorts with NOS  $\geq 6$  are considered high quality.

Abbreviations: BMI = body mass index; NOS = Newcastle-Ottawa Scale.

Supplemental Table S11. GRADE assessment.

| GRADE assessment      |                     |                    |                           |              |                       |                   |                   |             |           |                                                  |                                    |                                                    |  |
|-----------------------|---------------------|--------------------|---------------------------|--------------|-----------------------|-------------------|-------------------|-------------|-----------|--------------------------------------------------|------------------------------------|----------------------------------------------------|--|
| Outcome and trial (N) | Design              | Downgrades         |                           |              |                       |                   | Upgrade           |             |           | Effect (RR   OR   MD [95% CI], P <sub>MD</sub> ) | Certainty of Evidence <sup>a</sup> | Interpretation of magnitude of effect <sup>b</sup> |  |
|                       |                     | Risk of bias (ROB) | Inconsistency             | Indirectness | Imprecision           | Publication bias  | Dose response     | Attenuation | Magnitude |                                                  |                                    |                                                    |  |
| Mortality             |                     |                    |                           |              |                       |                   |                   |             |           |                                                  |                                    |                                                    |  |
| All-cause (7)         | Prospective Cohorts | Not serious        | Serious <sup>1</sup>      | Not serious  | Serious <sup>2</sup>  | None <sup>3</sup> | None <sup>4</sup> | None        | None      | ↓ 0.89 [0.82 to 0.97], P=0.007                   | ⊕○○○ Very low                      | Trivial                                            |  |
| CVD (7)               | Prospective Cohorts | Not serious        | Not serious               | Not serious  | Serious <sup>5</sup>  | None <sup>3</sup> | None <sup>4</sup> | None        | None      | ↔ 0.90 [0.80 to 1.01], P=0.150                   | ⊕○○○ Very low                      | No effect                                          |  |
| CHD (2)               | Prospective Cohorts | Not serious        | Serious <sup>6</sup>      | Not serious  | Serious <sup>7</sup>  | None <sup>3</sup> | None <sup>4</sup> | None        | None      | ↔ 0.97 [0.86 to 1.09], P=0.620                   | ⊕○○○ Very low                      | No effect                                          |  |
| Incidence             |                     |                    |                           |              |                       |                   |                   |             |           |                                                  |                                    |                                                    |  |
| CHD (4)               | Prospective Cohorts | Not serious        | Not serious               | Not serious  | Not serious           | None <sup>3</sup> | None <sup>4</sup> | None        | None      | ↔ 1.04 [0.96 to 1.12], P=0.34                    | ⊕⊕○○ Low                           | No effect                                          |  |
| Stroke (2)            | Prospective Cohorts | Not serious        | Not serious               | Not serious  | Serious <sup>8</sup>  | None <sup>3</sup> | None <sup>4</sup> | None        | None      | ↔ 0.84 [0.63 to 1.13], P=0.25                    | ⊕○○○ Very low                      | No effect                                          |  |
| Prevalence            |                     |                    |                           |              |                       |                   |                   |             |           |                                                  |                                    |                                                    |  |
| CVD (2)               | Cross-sectional     | Not serious        | Not serious               | Not serious  | Serious <sup>9</sup>  | None <sup>3</sup> | None <sup>4</sup> | None        | None      | ↔ 0.86 [0.67 to 1.09], P=0.21                    | ⊕○○○ Very low                      | No effect                                          |  |
| CHD (2)               | Cross-sectional     | Not serious        | Not serious               | Not serious  | Serious <sup>10</sup> | None <sup>3</sup> | None <sup>4</sup> | None        | None      | ↔ 0.80 [0.57 to 1.11], P=0.19                    | ⊕○○○ Very low                      | Trivial                                            |  |
| Stroke (2)            | Cross-sectional     | Not serious        | Not serious               | Not serious  | Serious <sup>11</sup> | None <sup>3</sup> | None <sup>4</sup> | None        | None      | ↔ 1.01 [0.75 to 1.35], P=0.97                    | ⊕○○○ Very low                      | No effect                                          |  |
| Risk Factors          |                     |                    |                           |              |                       |                   |                   |             |           |                                                  |                                    |                                                    |  |
| Blood Lipids          |                     |                    |                           |              |                       |                   |                   |             |           |                                                  |                                    |                                                    |  |
| HCL (1)               | Cross-sectional     | Not serious        | Not serious <sup>12</sup> | Not serious  | Not serious           | None <sup>3</sup> | None <sup>4</sup> | None        | None      | ↓ 0.68 [0.58 to 0.81], P<0.05                    | ⊕⊕○○ Low                           | Trivial                                            |  |
| High LDL-C (1)        | Cross-sectional     | Not serious        | Not serious <sup>12</sup> | Not serious  | Serious <sup>13</sup> | None <sup>3</sup> | None <sup>4</sup> | None        | None      | ↔ 0.80 [0.57 to 1.13], P=0.203                   | ⊕○○○ Very low                      | No effect                                          |  |
| LDL-C (1)             | Prospective Cohorts | Not serious        | Not serious <sup>12</sup> | Not serious  | Serious <sup>13</sup> | None <sup>3</sup> | None <sup>4</sup> | None        | None      | ↔ 0.37 [-15.36 to 16.09], P=0.96                 | ⊕○○○ Very low                      | No effect                                          |  |

|                     |                     |                      |                           |             |                       |                   |                   |      |      |                                   |               |           |
|---------------------|---------------------|----------------------|---------------------------|-------------|-----------------------|-------------------|-------------------|------|------|-----------------------------------|---------------|-----------|
| Low HDL-C (1)       | Cross-sectional     | Not serious          | Not serious <sup>12</sup> | Not serious | Serious <sup>13</sup> | None <sup>3</sup> | None <sup>4</sup> | None | None | ↔ 0.94 [0.70 to 1.27], P=0.700    | ⊕○○○ Very low | No effect |
| HDL-C (3)           | Prospective Cohorts | Serious <sup>1</sup> | Not serious               | Not serious | Serious <sup>13</sup> | None <sup>3</sup> | None <sup>4</sup> | None | None | ↔ -0.02 [-0.30 to 0.26], P=0.89   | ⊕○○○ Very low | No effect |
| HTG (1)             | Cross-sectional     | Not serious          | Not serious <sup>12</sup> | Not serious | Serious <sup>14</sup> | None <sup>3</sup> | None <sup>4</sup> | None | None | ↔ 0.83 [0.59 to 1.16], P=0.265    | ⊕○○○ Very low | No effect |
| TG (3)              | Prospective Cohorts | Serious <sup>1</sup> | Not serious               | Not serious | Serious <sup>13</sup> | None <sup>3</sup> | None <sup>4</sup> | None | None | ↔ 0.06 [-1.11 to 1.22], P=0.92    | ⊕○○○ Very low | No effect |
| Blood Pressure      |                     |                      |                           |             |                       |                   |                   |      |      |                                   |               |           |
| HTN (1)             | Cross-sectional     | Not serious          | Not serious <sup>12</sup> | Not serious | Serious <sup>15</sup> | None <sup>3</sup> | None <sup>4</sup> | None | None | ↔ 0.76 [0.55 to 1.04], P=0.083    | ⊕○○○ Very low | No effect |
| SBP (3)             | Prospective Cohorts | Serious <sup>1</sup> | Not serious               | Not serious | Serious <sup>16</sup> | None <sup>3</sup> | None <sup>4</sup> | None | None | ↔ 0.11 [-11.41 to 11.64], P=0.98  | ⊕○○○ Very low | No effect |
| DBP (1)             | Prospective Cohorts | Not serious          | Not serious <sup>12</sup> | Not serious | Serious <sup>16</sup> | None <sup>3</sup> | None <sup>4</sup> | None | None | ↔ 0.14 [-7.75 to 8.03], P=0.97    | ⊕○○○ Very low | No effect |
| Glycemic Control    |                     |                      |                           |             |                       |                   |                   |      |      |                                   |               |           |
| Diabetes (3)        | Cross-sectional     | Not serious          | Not serious               | Not serious | Serious <sup>17</sup> | None <sup>3</sup> | None <sup>4</sup> | None | None | ↔ 1.02 [0.84 to 1.24], P=0.804    | ⊕○○○ Very low | No effect |
| HbA1c (2)           | Prospective Cohorts | Serious <sup>5</sup> | Not serious               | Not serious | Serious <sup>18</sup> | None <sup>3</sup> | None <sup>4</sup> | None | None | ↔ 0.02 [-1.18 to 1.22], P=0.97    | ⊕○○○ Very low | No effect |
| Fasting Glucose (1) | Prospective Cohorts | Not serious          | Not serious <sup>12</sup> | Not serious | Serious <sup>19</sup> | None <sup>3</sup> | None <sup>4</sup> | None | None | ↔ -0.68 [-20.20 to 18.85], P=0.95 | ⊕○○○ Very low | No effect |
| Adiposity           |                     |                      |                           |             |                       |                   |                   |      |      |                                   |               |           |
| Obesity (1)         | Cross-sectional     | Not serious          | Not serious <sup>12</sup> | Not serious | Not serious           | None <sup>3</sup> | None <sup>4</sup> | None | None | ↓ 0.72 [0.59 to 0.88], P<0.05     | ⊕⊕○○ Low      | Trivial   |
| Body Weight (1)     | Prospective Cohorts | Not serious          | Not serious <sup>12</sup> | Not serious | Serious <sup>20</sup> | None <sup>3</sup> | None <sup>4</sup> | None | None | ↔ -0.14 [-4.59 to 4.31], P=0.95   | ⊕○○○ Very low | No effect |
| WC (3)              | Prospective Cohorts | Serious <sup>1</sup> | Not serious               | Not serious | Serious <sup>21</sup> | None <sup>3</sup> | None <sup>4</sup> | None | None | ↔ 0.12 [-4.94 to 5.18], P=0.96    | ⊕○○○ Very low | No effect |
| Inflammation        |                     |                      |                           |             |                       |                   |                   |      |      |                                   |               |           |
| CRP (1)             | Cross-sectional     | Not serious          | Not serious <sup>12</sup> | Not serious | Not serious           | None <sup>3</sup> | None <sup>4</sup> | None | None | ↔ -0.01 [-0.13 to 0.11], P=0.89   | ⊕⊕○○ Low      | No effect |

| Risk Scores |                     |                      |                           |             |                       |                   |                   |      |      |                                 |               |           |
|-------------|---------------------|----------------------|---------------------------|-------------|-----------------------|-------------------|-------------------|------|------|---------------------------------|---------------|-----------|
| CCMR (2)    | Prospective Cohorts | Serious <sup>5</sup> | Not serious               | Not serious | Not serious           | None <sup>3</sup> | None <sup>4</sup> | None | None | ↔ 0.02 [-0.48 to 0.52], P=0.94  | ⊕⊕○○ Low      | No effect |
| FRS (1)     | Cross-sectional     | Not serious          | Not serious <sup>12</sup> | Not serious | Serious <sup>22</sup> | None <sup>3</sup> | None <sup>4</sup> | None | None | ↔ -0.12 [-2.18 to 1.94], P=0.91 | ⊕○○○ Very low | No effect |

<sup>a</sup> Since all included studies were observational cohorts, the certainty of the evidence was graded as low for all outcomes by default and then downgraded or upgraded based on pre-specified criteria. Criteria for downgrades included risk of bias (ROB) (downgraded if the majority of trials were considered to be at high ROB); inconsistency (downgraded if there was substantial unexplained heterogeneity [ $I^2 \geq 50\%$ ,  $P_Q < 0.10$ ]; indirectness (downgraded if there were factors absent or present relating to the participants, interventions, or outcomes that limited the generalizability of the results); imprecision (downgraded if the 95% confidence interval crossed the minimally important difference [MID] for harm or benefit set at RR=0.05 for the mortality, prevalence and incidence related outcomes, 0.1 mmol/L for lipids [12–14], 2 mm Hg for systolic and diastolic blood pressure [15], 0.3% for HbA1c [16], 0.5 mmol/L for fasting glucose [17], 0.5 kg for body weight, 2 cm for waist circumference, [18,19], 0.5 mg/L for CRP [20–22], 5% change for CCMR, 0.65 points for FRS [23]; and publication bias (downgraded if there were more than 10 comparisons and there is evidence of publication bias based on funnel plot asymmetry and/or significant Egger's or Begg's tests ( $P < 0.10$ ) with confirmation by adjustment by Duval and Tweedie trim-and-fill analysis). Criteria for upgrades included a significant dose-response gradient, attenuation, and large magnitude of effect.

<sup>b</sup> For the interpretation of the magnitude, MIDs were used (see a above) to assess the importance of magnitude of our point estimate using the effect size categories according to new GRADE guidance. MIDs were then used to assess the importance of the magnitude of our point estimates using the effect size categories according GRADE guidance [24–26] as follows: large effect ( $\geq 5 \times$  MID); moderate effect ( $\geq 2 \times$  MID); small important effect ( $\geq 1 \times$  MID); and trivial/unimportant effect ( $< 1$  MID).

Abbreviations: BMI, body mass index; CCMR, clustered cardiometabolic risk scores; CI, confidence interval; DBP, diastolic blood pressure; DR, dose response; GRADE, Grading of Recommendations Assessment Development and Evaluation; HbA1c, hemoglobin A1c; HCL = hypercholesterolemia; HDL-C, high-density lipoprotein-cholesterol; HTG = hypertriglyceridemia; HTN = hypertension; LDL-C, low-density lipoprotein-cholesterol; MD, mean difference; MID, minimally important difference; OR, odds ratio; ROB, risk of bias; RR, risk ratio; SBP, systolic blood pressure; SMD, standardized mean difference; WC, waist circumference.

<sup>1</sup> Downgrade for serious inconsistency as there was evidence of substantial inter-study heterogeneity ( $I^2=68.5\%$ ,  $P=0.004$ ).

<sup>2</sup> Downgrade for serious imprecision, as the lower bound of the 95% CI (HR, 0.82) includes the MID of 5% while the upper bound of the 95% CI (HR, 0.97) crosses the MID (RR=0.05).

<sup>3</sup> No downgrade for publication bias, as publication bias could not be assessed due to lack of power for assessing funnel plot asymmetry and small study effects ( $< 10$  trial comparisons included in the meta-analysis).

<sup>4</sup> No upgrade for dose-response, as dose-response could not be assessed due to lack of appropriate data for analysis.

<sup>5</sup> Downgrade for serious imprecision, as the lower bound of the 95% CI (HR, 0.83) includes the MID of 5% while the upper bound of the 95% CI (HR, 1.03) crosses the MID (RR=0.05).

<sup>6</sup> Downgrade for serious inconsistency as there was evidence of substantial inter-study heterogeneity ( $I^2=78.7\%$ ,  $P=0.03$ ).

- <sup>7</sup> Downgrade for serious imprecision, as the lower bound of the 95% CI (HR, 0.47) includes the MID of 5% while the upper bound of the 95% CI (HR, 0.98) crosses the MID (RR=0.05).
- <sup>8</sup> Downgrade for serious imprecision, as the lower and upper bound of the 95% CIs (HR, 0.63 to 1.13) includes both clinically important benefit (HR<0.95) and harm (HR≥1.05).
- <sup>9</sup> Downgrade for serious imprecision, as the lower bound of the 95% CI (RR, 0.67) includes the MID of 5% while the upper bound of the 95% CI (RR, 1.09) crosses the MID (RR=0.05).
- <sup>10</sup> Downgrade for serious imprecision, as the lower bound of the 95% CI (RR, 0.57) includes the MID of 5% while the upper bound of the 95% CI (RR, 1.11) crosses the MID (RR=0.05).
- <sup>11</sup> Downgrade for serious imprecision, as the lower bound of the 95% CI (RR, 0.75) includes the MID of 5% while the upper bound of the 95% CI (RR, 1.35) crosses the MID (RR=0.05).
- <sup>12</sup> No downgrade for inconsistency as analyses for inconsistency could not be performed due to <2 observations available.
- <sup>13</sup> Downgrade for serious imprecision as the 95% CI overlaps the MID of clinically important harm or benefit for lipids (0.1 mmol/L).
- <sup>14</sup> Downgrade for serious imprecision as the lower bound of the 95% CI (RR, 0.59) includes the MID of 5% while the upper bound of the 95% CI (RR, 1.16) crosses the MID (RR=0.05).
- <sup>15</sup> Downgrade for serious imprecision as the lower bound of the 95% CI (RR, 0.55) includes the MID of 5% while the upper bound of the 95% CI (RR, 1.04) crosses the MID (RR=0.05).
- <sup>16</sup> Downgrade for serious imprecision as the 95% CI overlaps the MID of clinically important benefit for blood pressure (2 mm Hg).
- <sup>17</sup> Downgrade for serious imprecision as the lower bound of the 95% CI (RR, 0.84) includes the MID of 5% while the upper bound of the 95% CI (RR, 1.24) crosses the MID (RR=0.05).
- <sup>18</sup> Downgrade for serious imprecision as the 95% CI overlaps the MID of clinically important benefit for HbA1c (0.3%).
- <sup>19</sup> Downgrade for serious imprecision as the 95% CI overlaps the MID of clinically important benefit for fasting glucose (0.5 mmol/L).
- <sup>20</sup> Downgrade for serious imprecision as the 95% CI overlaps the MID of clinically important benefit for body weight (0.5 kg).
- <sup>21</sup> Downgrade for serious imprecision as the 95% CI overlaps the MID of clinically important benefit for waist circumference (2 cm).
- <sup>22</sup> Downgrade for serious imprecision as the 95% CI overlaps the MID of clinically important benefit for FRS (0.65 points).

## Supplementary Figures

**Supplemental Figure S1.** Forest plot of prospective cohort studies of the association between variety of vegetable and/or fruit intake and all-cause mortality.

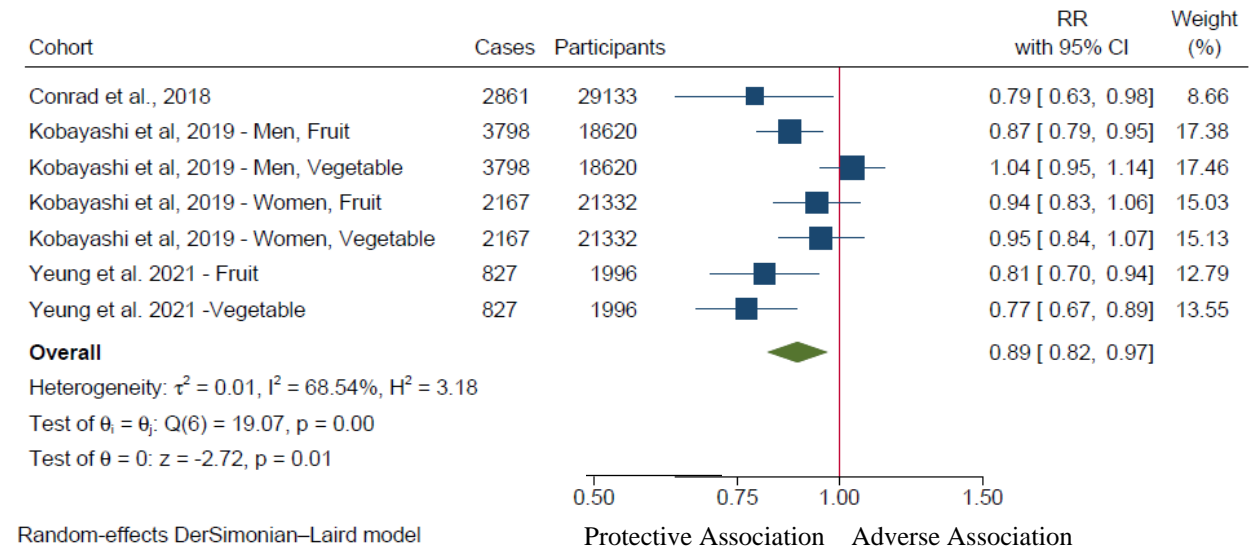

CI = confidence interval; RR = risk ratio.

**Supplemental Figure S2.** Forest plot of prospective cohort studies of the association between variety of vegetable and/or fruit intake and CVD mortality.

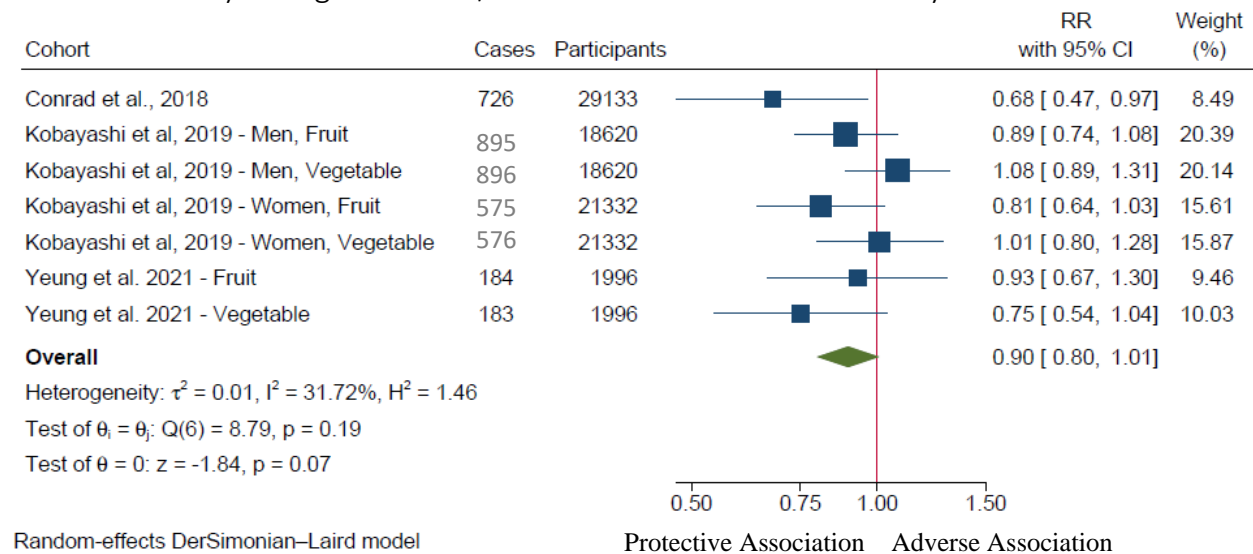

CI = confidence interval; CVD = cardiovascular disease; RR = risk ratio.

**Supplemental Figure S3.** Forest plot of prospective cohort studies of the association between variety of vegetable and/or fruit intake and CHD mortality.

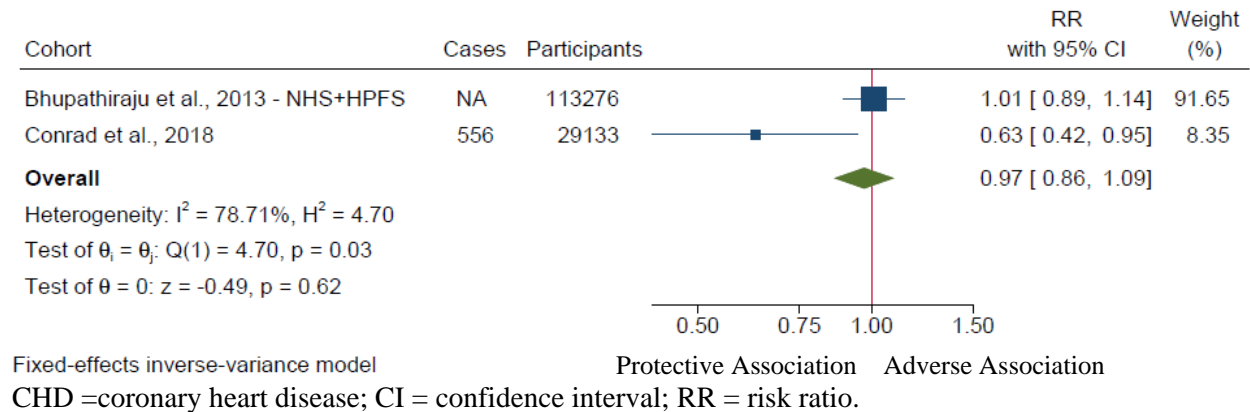

**Supplemental Figure S4.** Forest plot of prospective cohort studies of the association between variety of vegetable and/or fruit intake and CHD incidence.

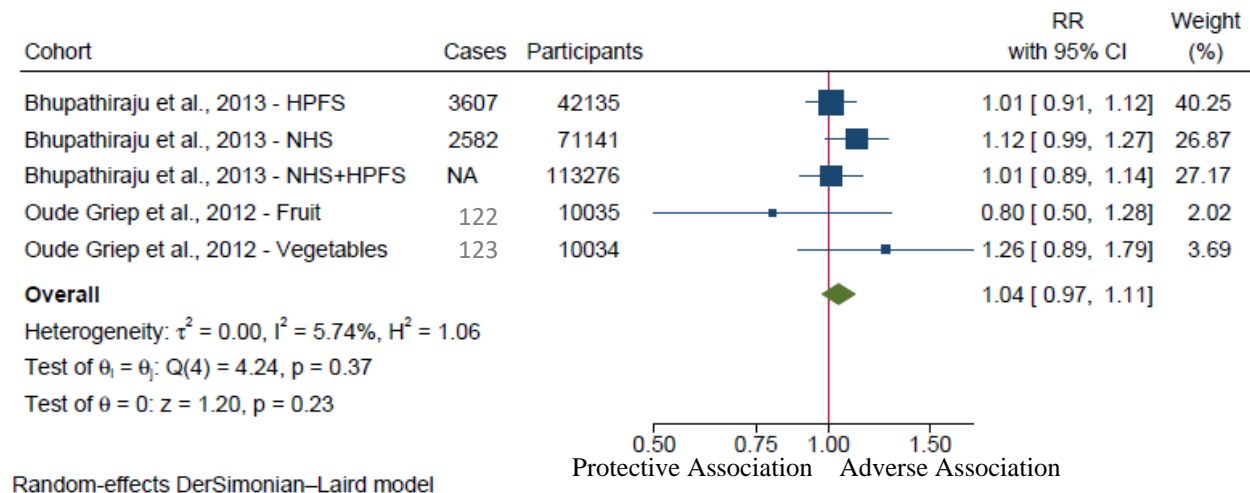

CHD = coronary heart disease; CI = confidence interval; HPFS = Health Professionals Follow-up Study; NHS = Nurses' Health Study; RR = risk ratio.



**Supplemental Figure S5.** Forest plot of prospective cohort studies of the association between variety of vegetable and/or fruit intake and stroke incidence.

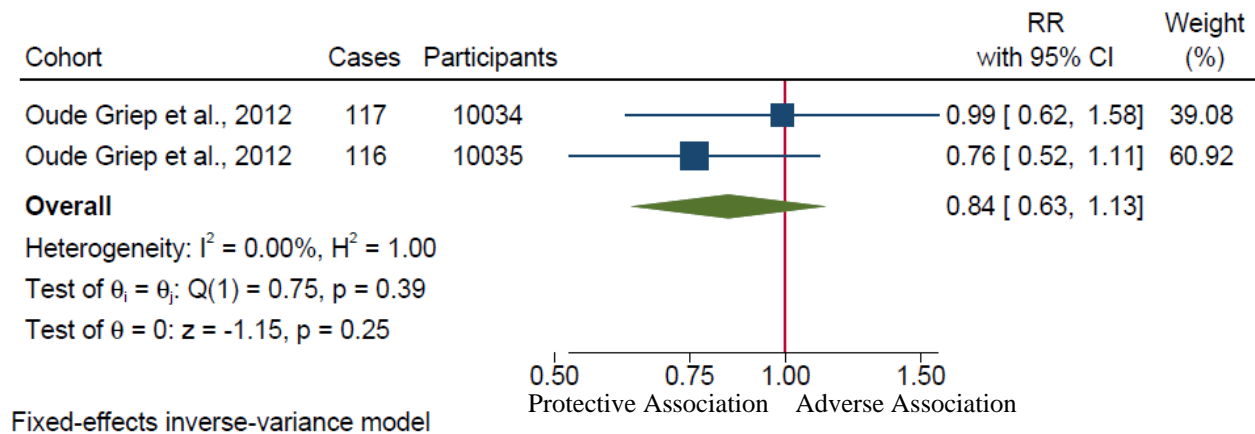

CI = confidence interval; RR = risk ratio.

**Supplemental Figure S6.** Forest plot of cross-sectional cohort studies of the association between variety of vegetable and/or fruit intake and CVD prevalence.

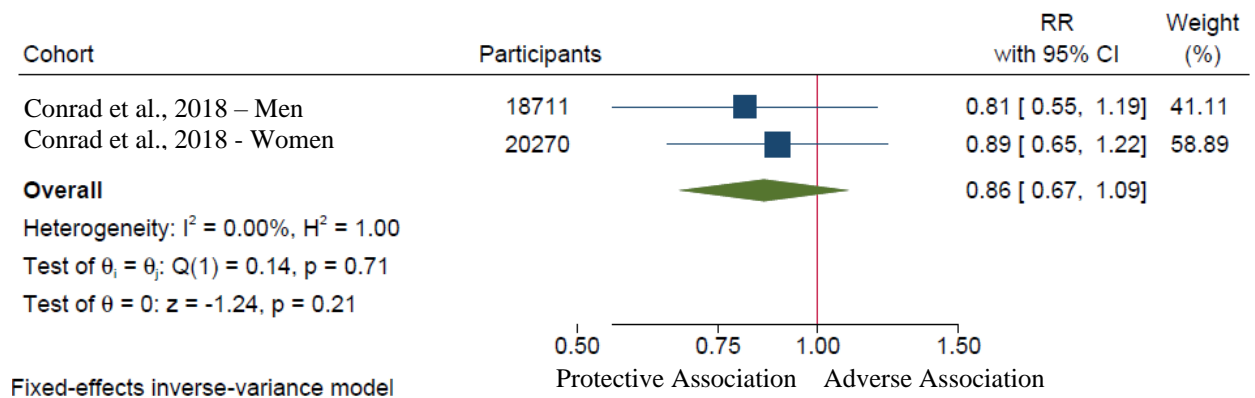

CI = confidence interval; CVD = cardiovascular disease; RR = risk ratio.

**Supplemental Figure S7.** Forest plot of cross-sectional cohort studies of the association between variety of vegetable and/or fruit intake and CHD prevalence.

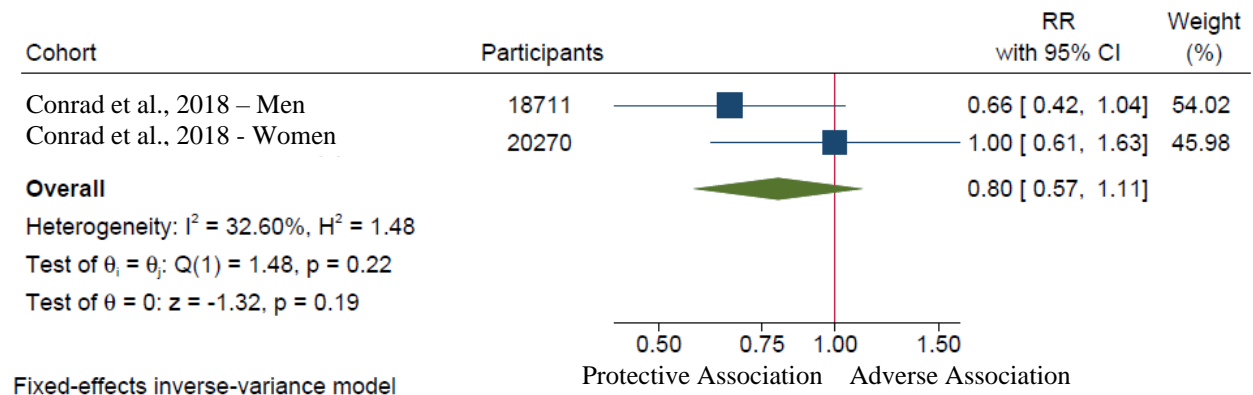

CHD = coronary heart disease; CI = confidence interval; RR = risk ratio.

**Supplemental Figure S8.** Forest plot of cross-sectional cohort studies of the association between variety of vegetable and/or fruit intake and stroke prevalence.

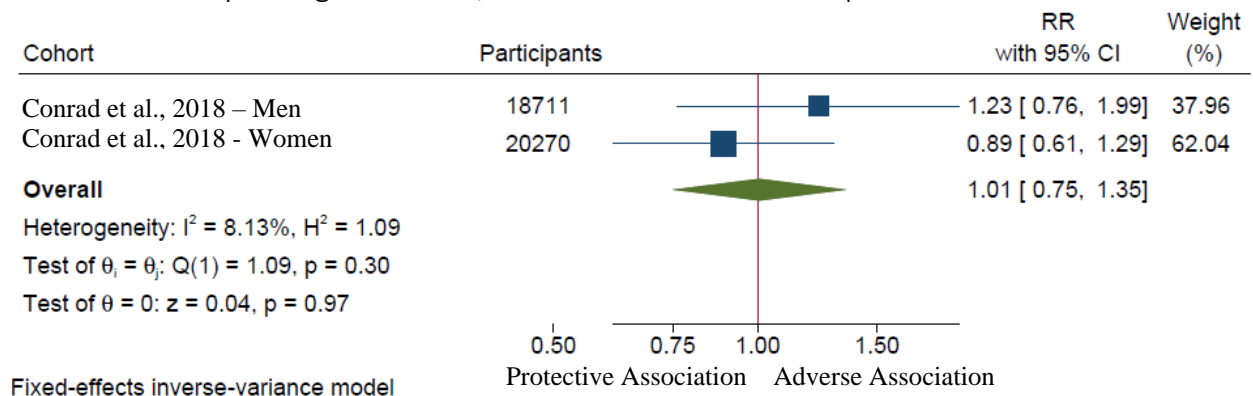

CHD = coronary heart disease; CI = confidence interval; RR = risk ratio.

**Supplemental Figure S9.** Forest plot of prospective cohort studies of the association between variety of vegetable and/or fruit intake and hypercholesterolemia.

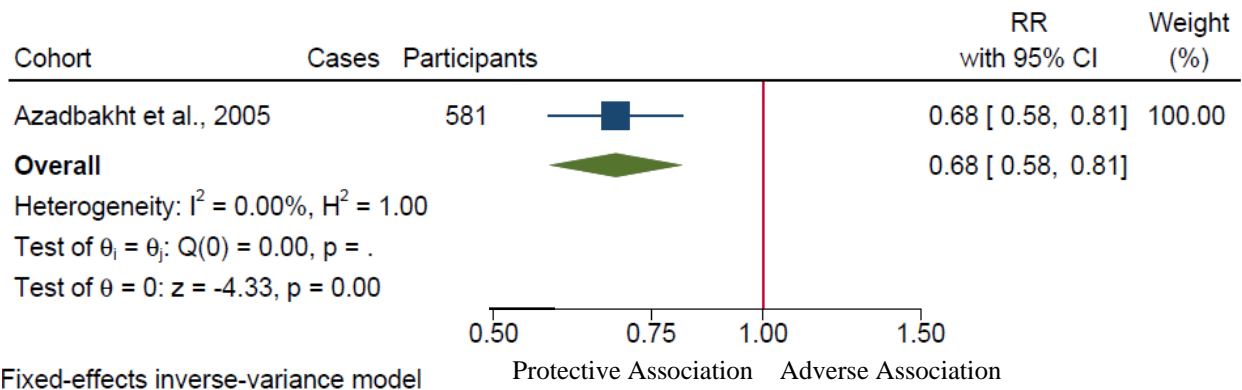

CI = confidence interval; RR = risk ratio.

**Supplemental Figure S10.** Forest plot of prospective cohort studies of the association between variety of vegetable and/or fruit intake and high LDL-C.

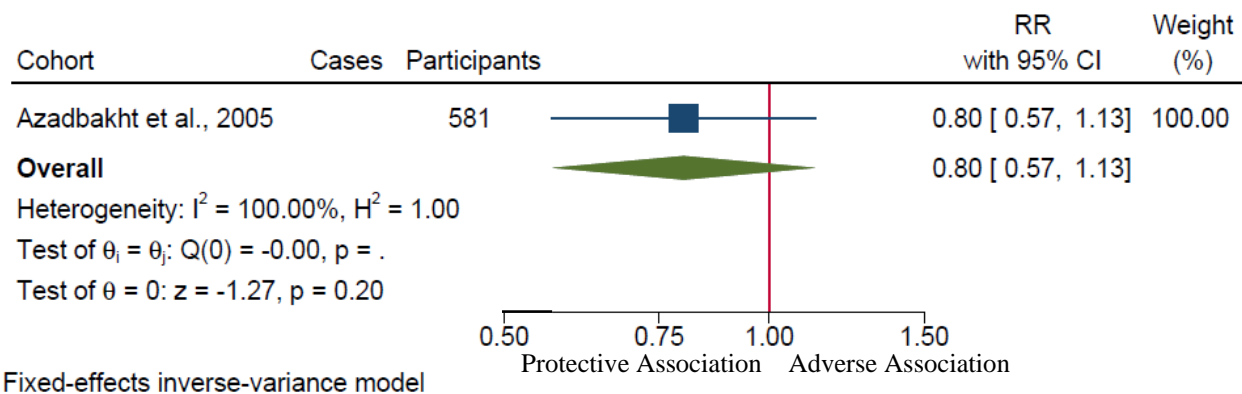

High LDL-C refers to an LDL-C level greater than or equal to 4.1 mmol/L.  
 CI = confidence interval; LDL-C = low-density lipoprotein-cholesterol; RR = risk ratio.

**Supplemental Figure S11.** Forest plot of prospective cohort studies of the association between variety of vegetable and/or fruit intake and LDL-C.

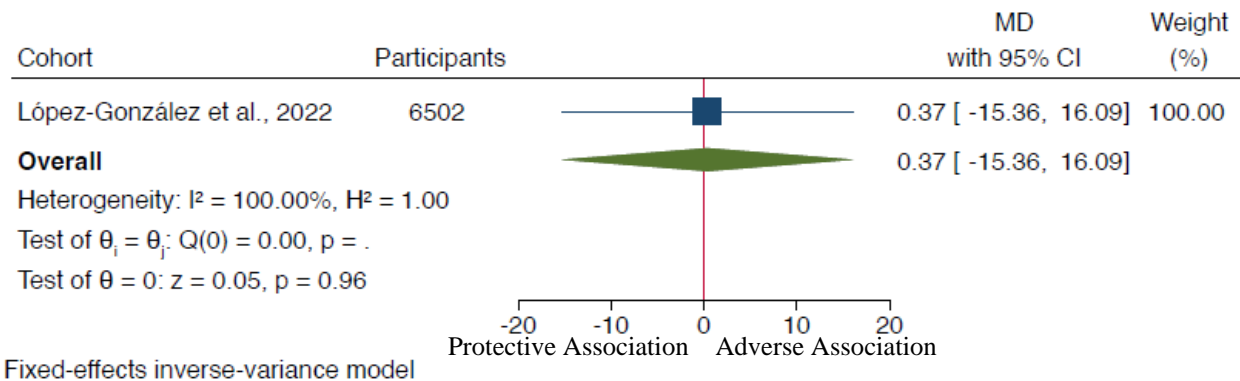

CI = confidence interval; LDL-C = low-density lipoprotein-cholesterol; MD = mean difference.

**Supplemental Figure S12.** Forest plot of prospective cohort studies of the association between variety of vegetable and/or fruit intake and low HDL-C.

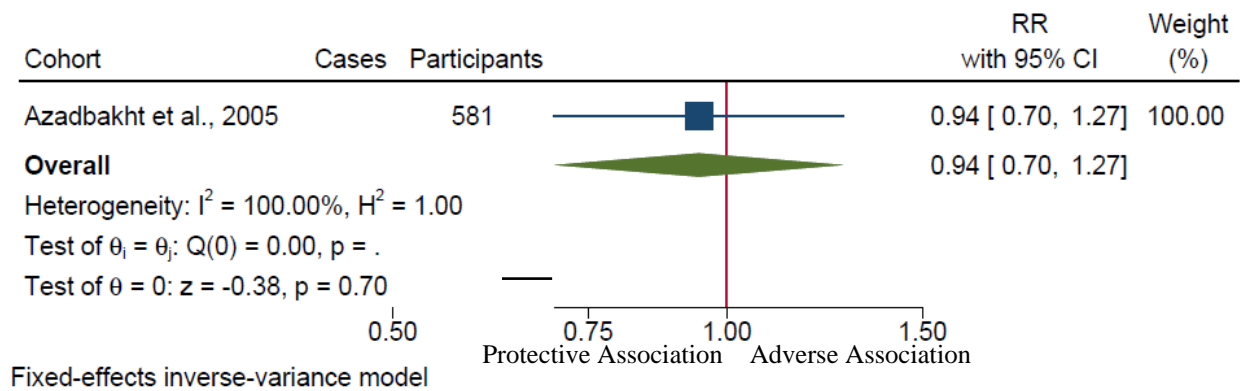

Low HDL-C refers to an HDL-C level less than 1.03 mmol/L.  
CI = confidence interval; HDL-C = high-density lipoprotein-cholesterol; RR = risk ratio.

**Supplemental Figure S13.** Forest plot of prospective cohort studies of the association between variety of vegetable and/or fruit intake and HDL-C.

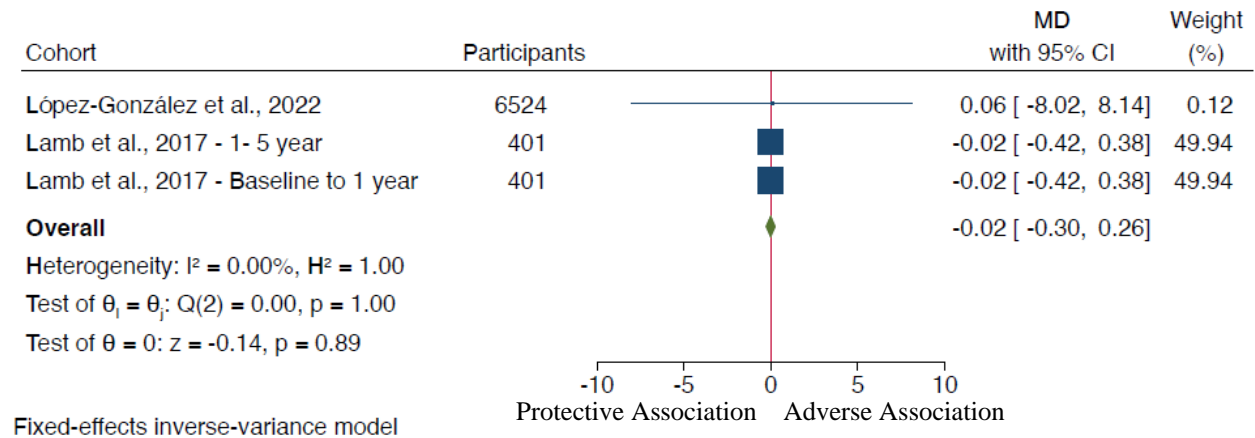

CI = confidence interval; HDL-C = high-density lipoprotein-cholesterol; MD = mean difference.

**Supplemental Figure S14.** Forest plot of prospective cohort studies of the association between variety of vegetable and/or fruit intake and hypertriglyceridemia.

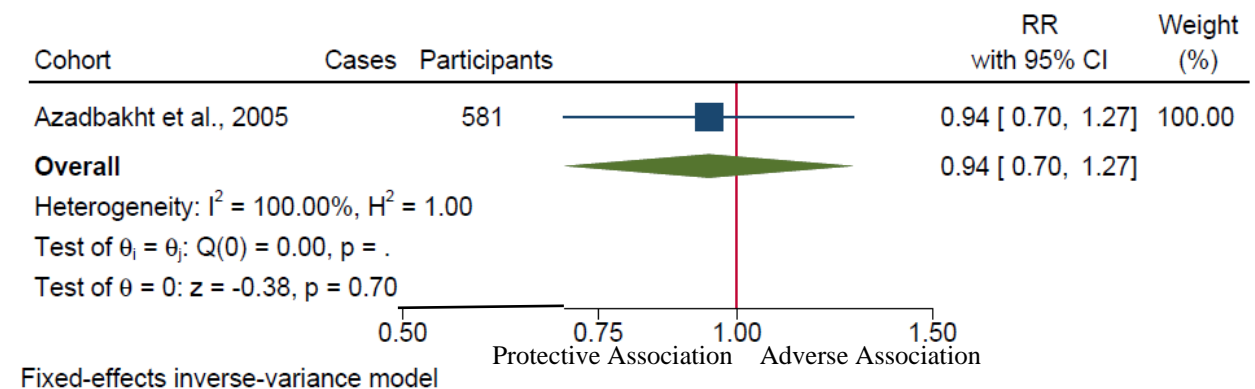

Hypertriglyceridemia refers to a triglyceride level greater than or equal to 2.3 mmol/L.

CI = confidence interval; RR = risk ratio.

**Supplemental Figure S15.** Forest plot of prospective cohort studies of the association between variety of vegetable and/or fruit intake and triglycerides.

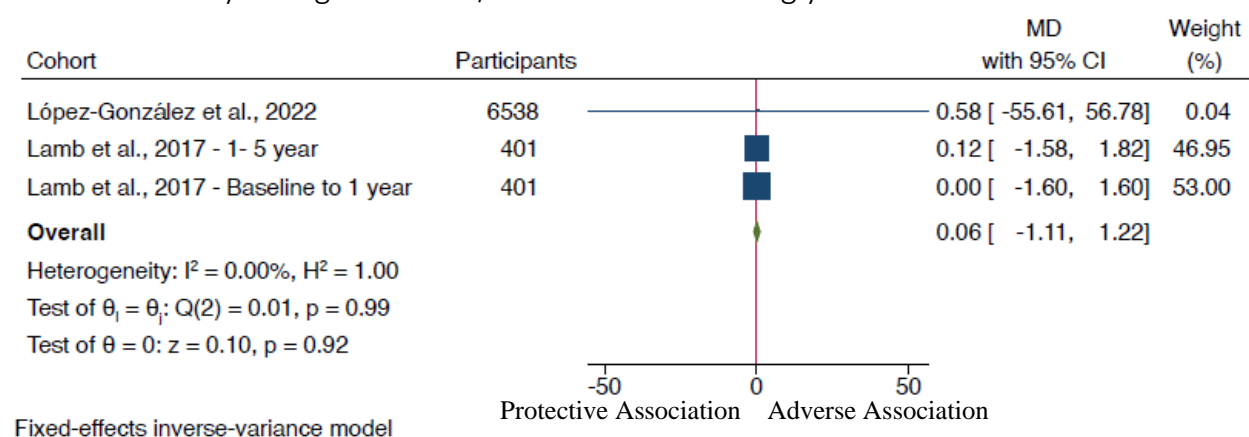

CI = confidence interval; MD = mean difference.

**Supplemental Figure S16.** Forest plot of cross-sectional cohort studies of the association between variety of vegetable and/or fruit intake and hypertension.

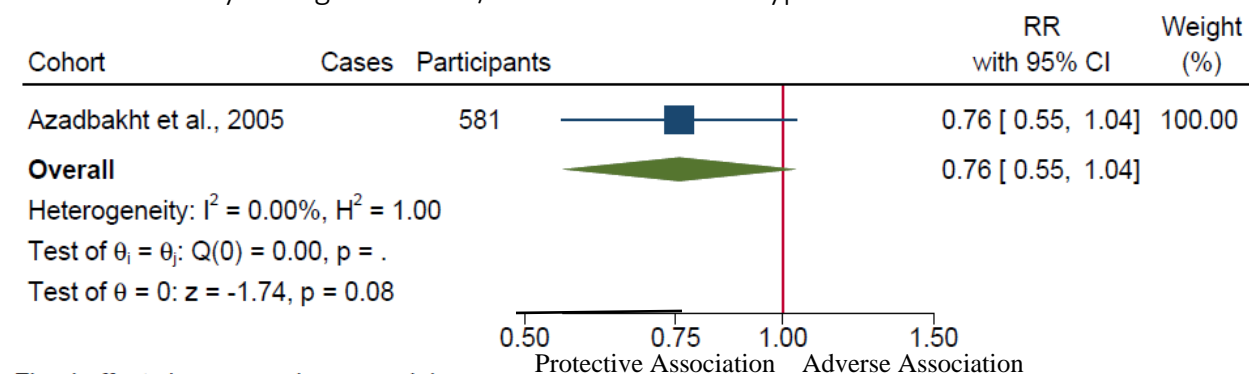

Hypertension refers to a systolic blood pressure  $\geq 140$  mm Hg or diastolic blood pressure  $\geq 90$  mm Hg.  
 CI = confidence interval; RR = risk ratio.

**Supplemental Figure S17.** Forest plot of prospective cohort studies of the association between variety of vegetable and/or fruit intake and systolic blood pressure.

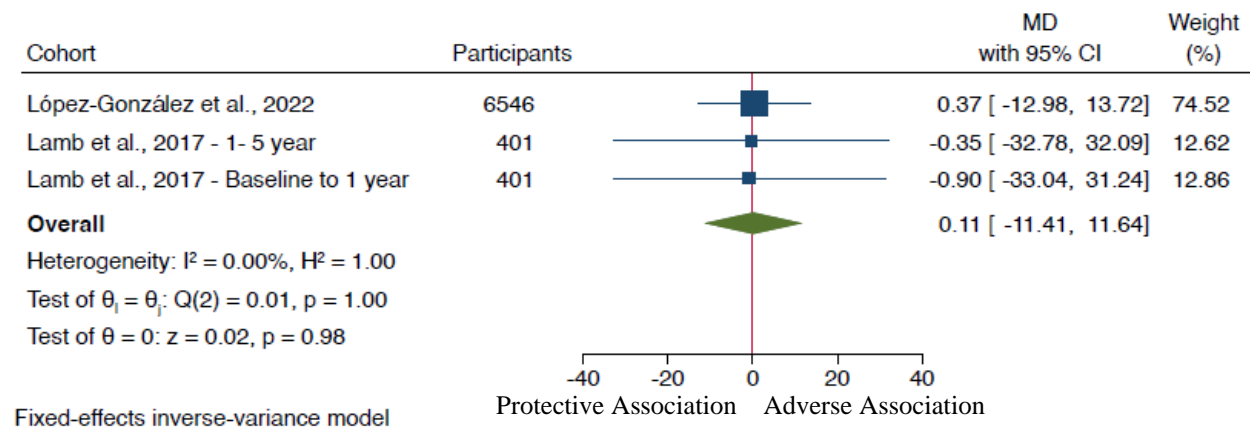

CI = confidence interval; MD = mean difference.

**Supplemental Figure S18.** Forest plot of prospective cohort studies of the association between variety of vegetable and/or fruit intake and diastolic blood pressure.

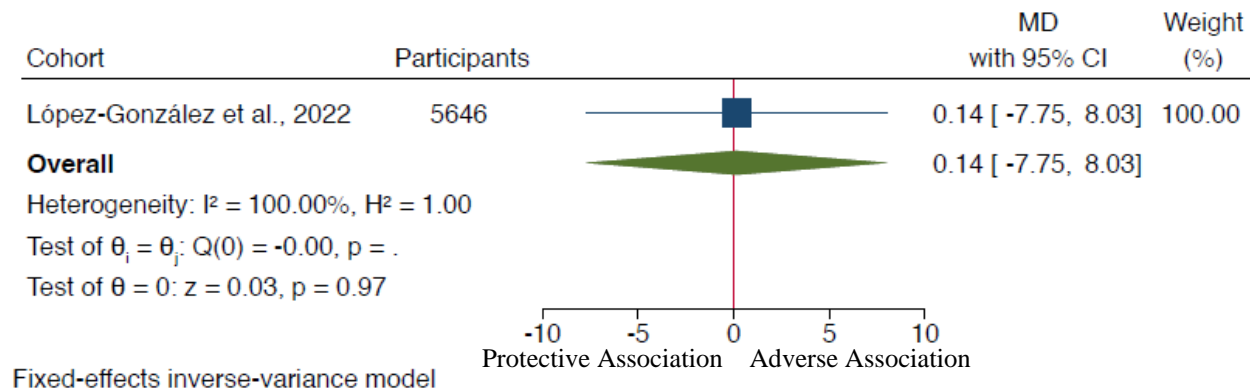

CI = confidence interval; MD = mean difference.

**Supplemental Figure S19.** Forest plot of cross-sectional studies of the association between variety of vegetable and/or fruit intake and obesity.

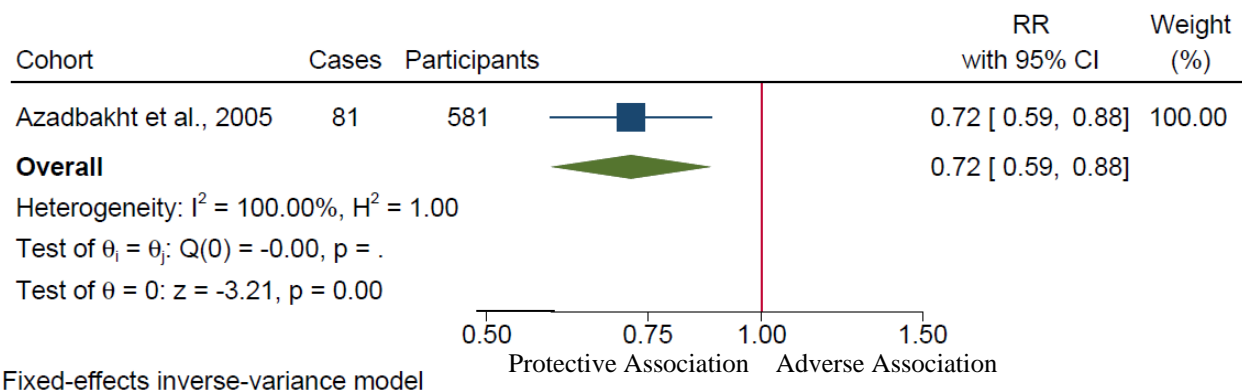

Obesity refers to a body mass index  $\geq 30$  kg/m<sup>2</sup>.  
CI = confidence interval; RR = risk ratio.

**Supplemental Figure S20.** Forest plot of prospective cohort studies of the association between variety of vegetable and/or fruit intake and body weight.

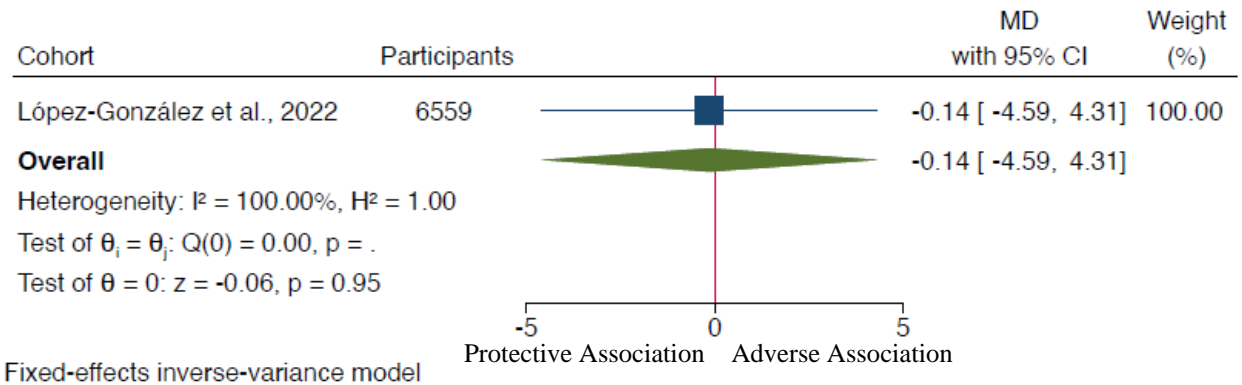

CI = confidence interval; MD = mean difference.



**Supplemental Figure S21.** Forest plot of prospective cohort studies of the association between variety of vegetable and/or fruit intake and waist circumference.

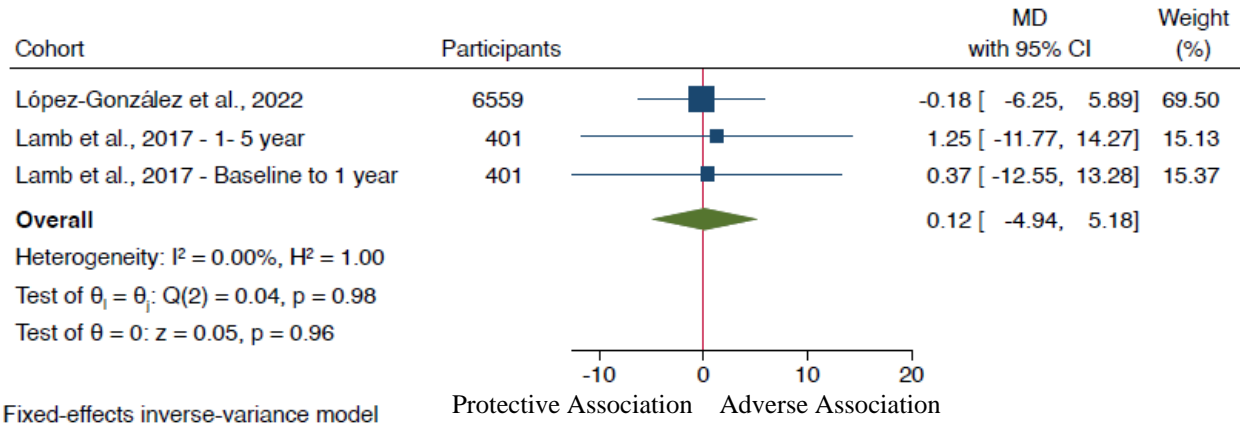

CI = confidence interval; MD = mean difference.

**Supplemental Figure S22.** Forest plot of prospective cohort studies of the association between variety of vegetable and/or fruit intake and C-reactive protein.

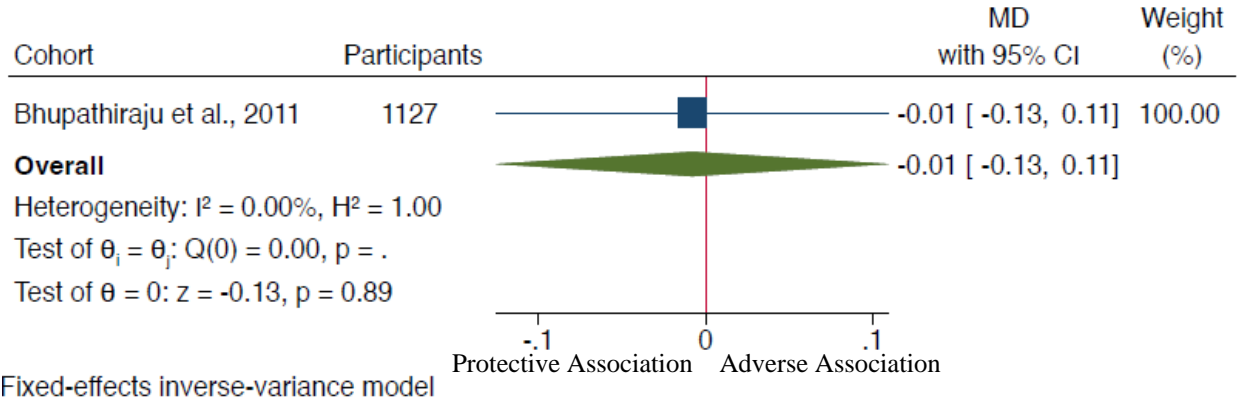

CI = confidence interval; MD = mean difference.

**Supplemental Figure S23.** Forest plot of cross-sectional studies of the association between variety of vegetable and/or fruit intake and diabetes.

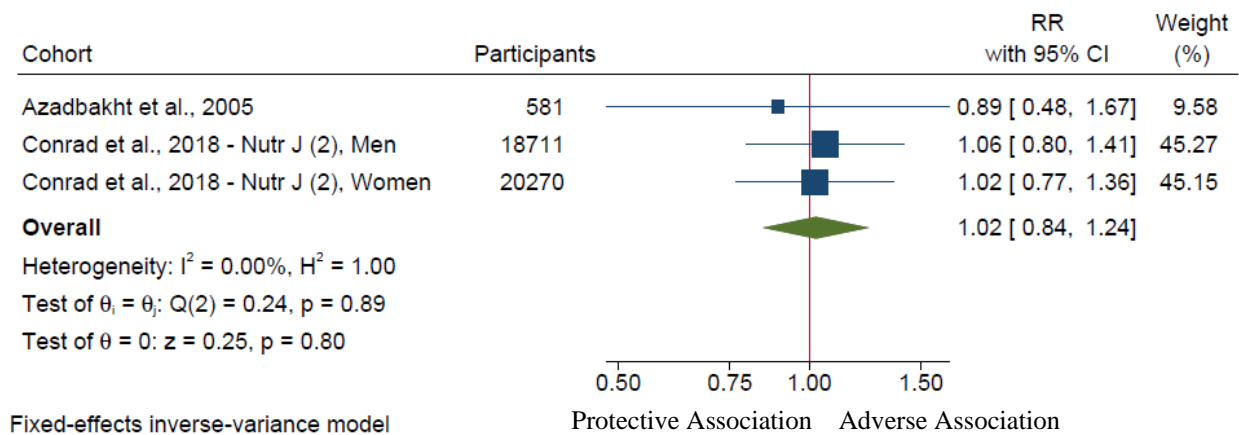

Diabetes in one study (Azadbakht et al., 2005) was defined at  $FBG \geq 7.0$  mmol/L or  $2HPG \geq 11.1$  mmol/L.  
2HPG = 2-hour postprandial glucose; CI = confidence interval; FBG = fasting blood glucose; RR = risk ratio.

**Supplemental Figure S24.** Forest plot of prospective cohort studies of the association between variety of vegetable and/or fruit intake and fasting glucose.

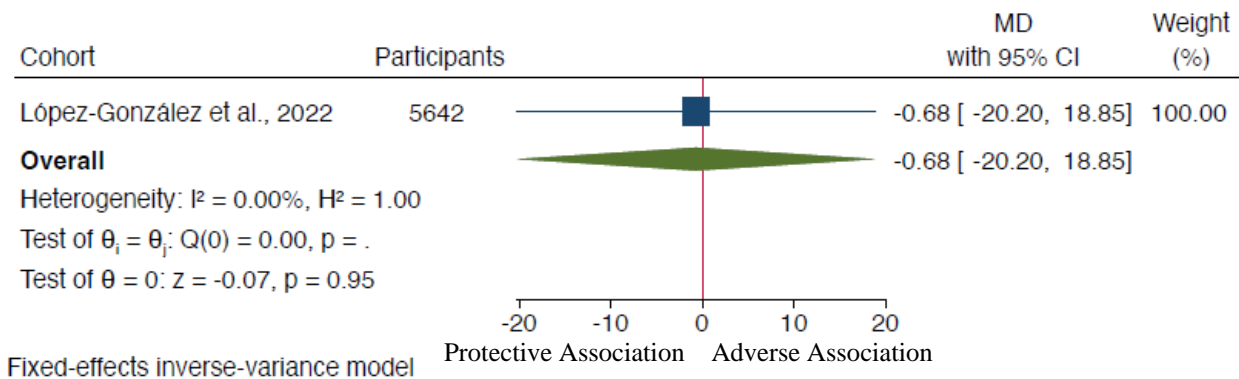

CI = confidence interval; MD = mean difference.

**Supplemental Figure S25.** Forest plot of prospective cohort studies of the association between variety of vegetable and/or fruit intake and hemoglobin A1c.

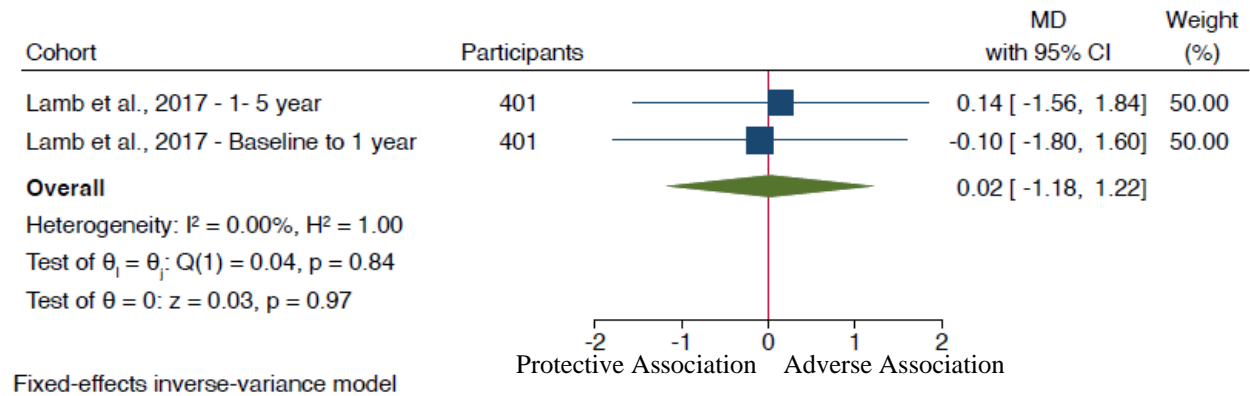

CI = confidence interval; MD = mean difference.

**Supplemental Figure S26.** Forest plot of prospective cohort studies of the association between variety of vegetable and/or fruit intake and CCMR.

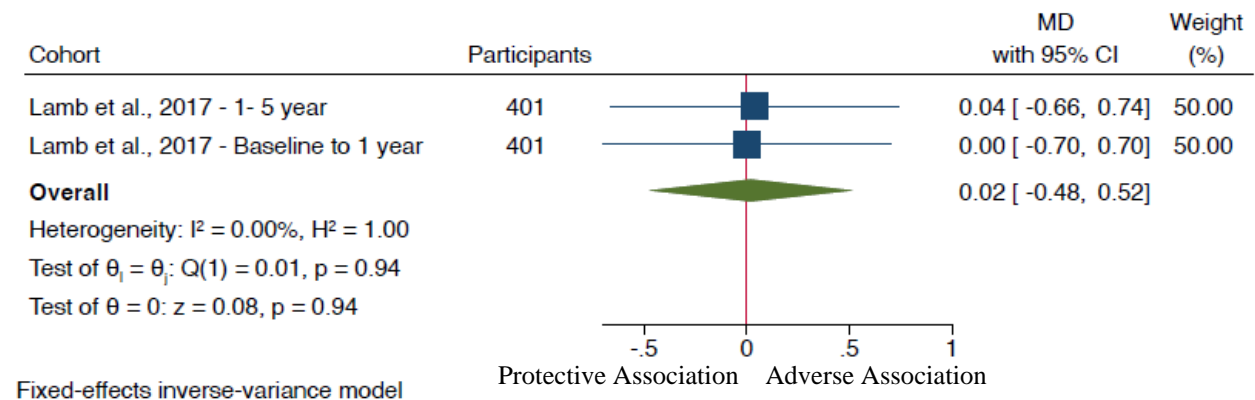

CCMR = Clustered cardiometabolic risk scores; CI = confidence interval; MD = mean difference.

**Supplemental Figure S27.** Forest plot of prospective cohort studies of the association between variety of vegetable and/or fruit intake and Framingham Risk Score.

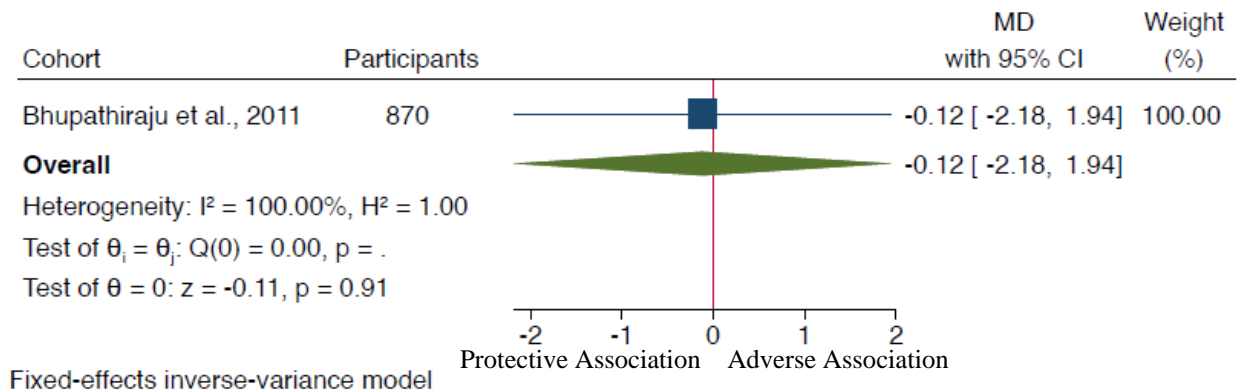

CI = confidence interval; MD = mean difference.

**Supplemental Figure S28.** Sensitivity analysis of the systematic removal of each cohort for the association between variety of vegetable and/or fruit intake and all-cause mortality in prospective cohorts.

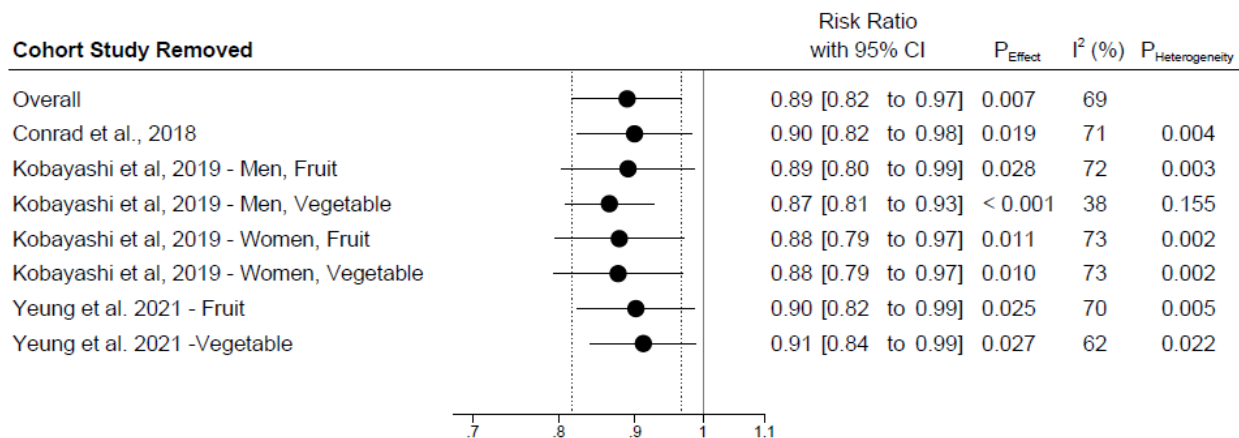

CI= confidence interval;  $I^2$ =heterogeneity

**Supplemental Figure S29.** Sensitivity analysis of the systematic removal of each cohort for the association between variety of vegetable and/or fruit intake and cardiovascular mortality in prospective cohorts.

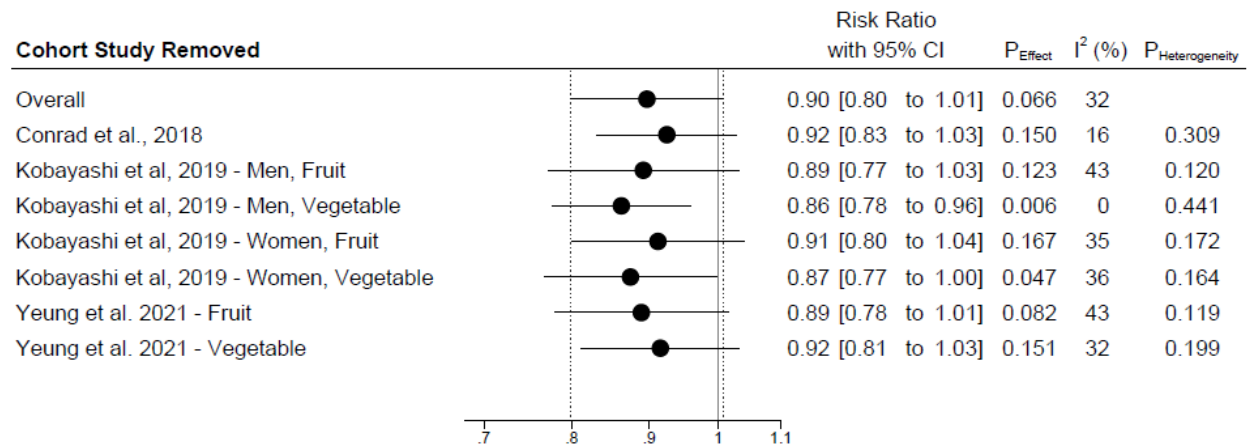

*Influence analysis: Removal of each cohort study, one at a time and recalculation of the overall effect and heterogeneity*

CI= confidence interval; I<sup>2</sup>=heterogeneity

**Supplemental Figure S30.** Sensitivity analysis of the systematic removal of each cohort for the association between variety of vegetable and/or fruit intake and coronary heart disease incidence in prospective cohorts.

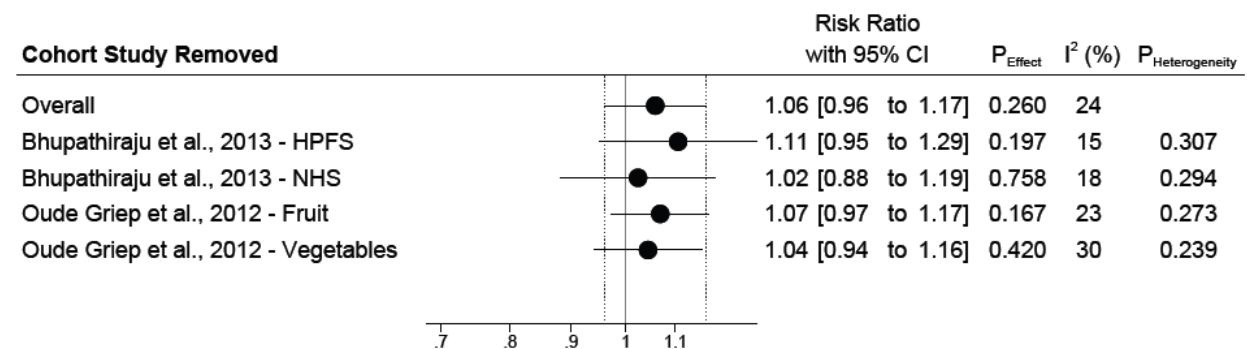

*Influence analysis: Removal of each cohort study, one at a time and recalculation of the overall effect and heterogeneity*

CI= confidence interval; I<sup>2</sup>=heterogeneity

**Supplemental Figure S31.** Sensitivity analysis of the systematic removal of each cohort for the association between variety of vegetable and/or fruit intake and systolic blood pressure in prospective cohorts.

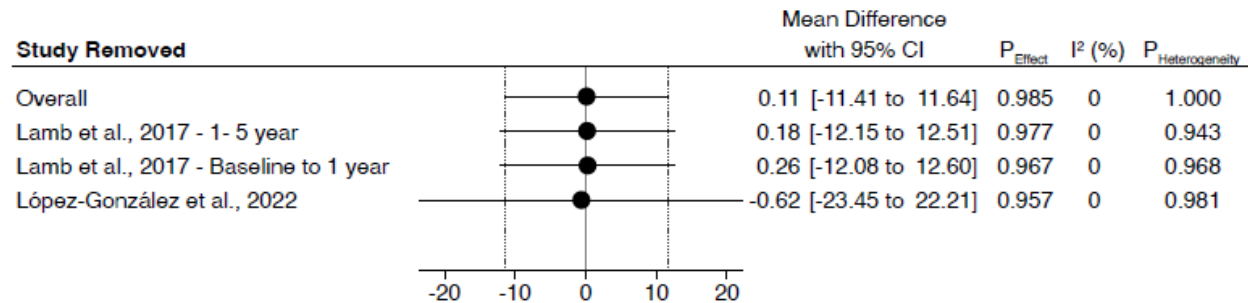

*Influence analysis: Removal of each study, one at a time and recalculation of the overall effect and heterogeneity*

CI= confidence interval; I<sup>2</sup>=heterogeneity

**Supplemental Figure S32.** Sensitivity analysis of the systematic removal of each cohort for the association between variety of vegetable and/or fruit intake and HDL-C in prospective cohorts.

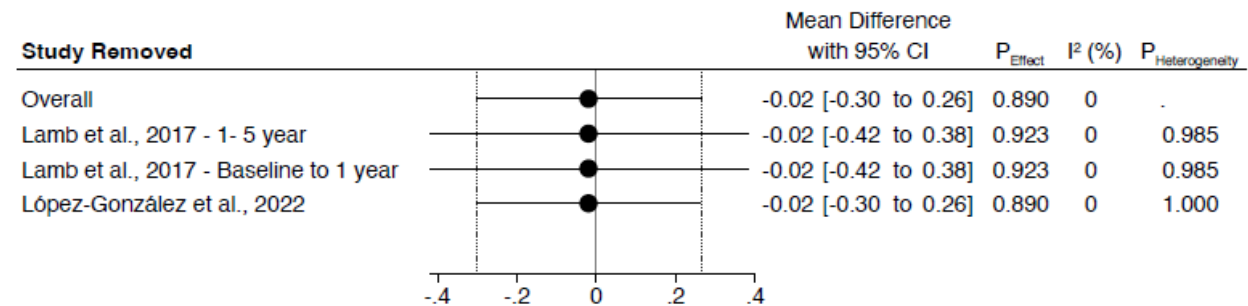

*Influence analysis: Removal of each study, one at a time and recalculation of the overall effect and heterogeneity*

CI= confidence interval; HDL-C = high-density lipoprotein-cholesterol; I<sup>2</sup>=heterogeneity

**Supplemental Figure S33.** Sensitivity analysis of the systematic removal of each cohort for the association between variety of vegetable and/or fruit intake and triglycerides in prospective cohorts.

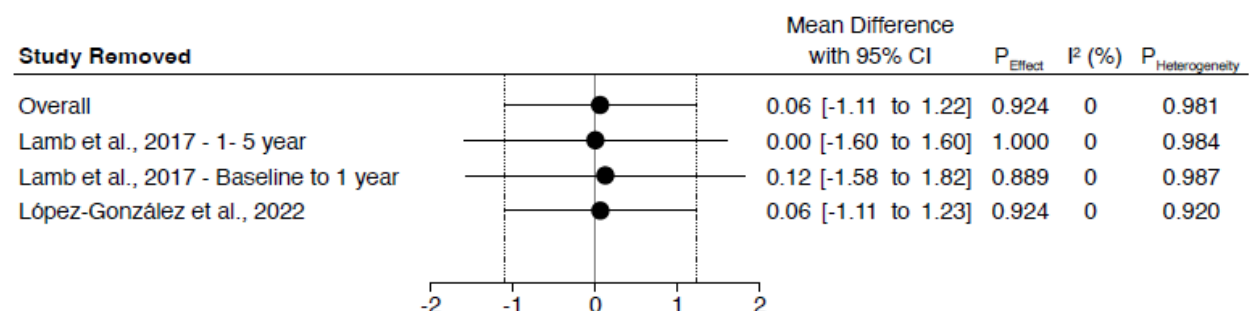

*Influence analysis: Removal of each study, one at a time and recalculation of the overall effect and heterogeneity*

CI= confidence interval; I²=heterogeneity

**Supplemental Figure S34.** Sensitivity analysis of the systematic removal of each cohort for the association between variety of vegetable and/or fruit intake and waist circumference in prospective cohorts.

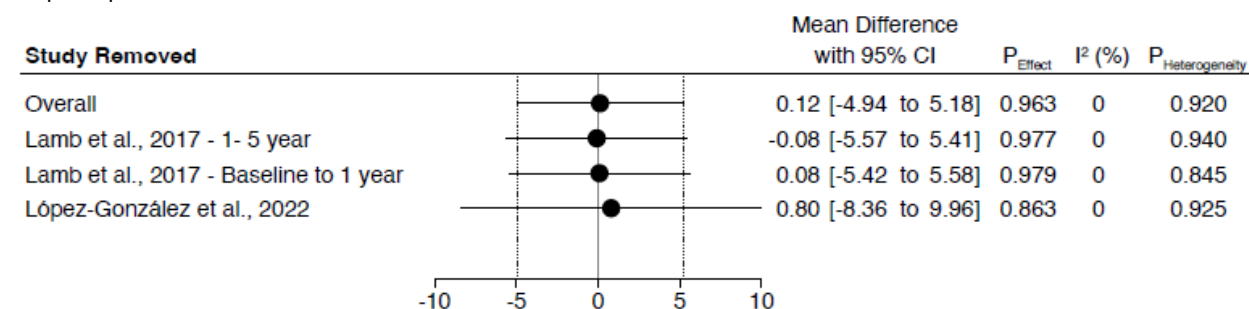

*Influence analysis: Removal of each study, one at a time and recalculation of the overall effect and heterogeneity*

CI= confidence interval; I²=heterogeneity

**Supplemental Figure S35.** Sensitivity analysis of the systematic removal of each cohort for the association between variety of vegetable and/or fruit intake and diabetes in cross-sectional studies.

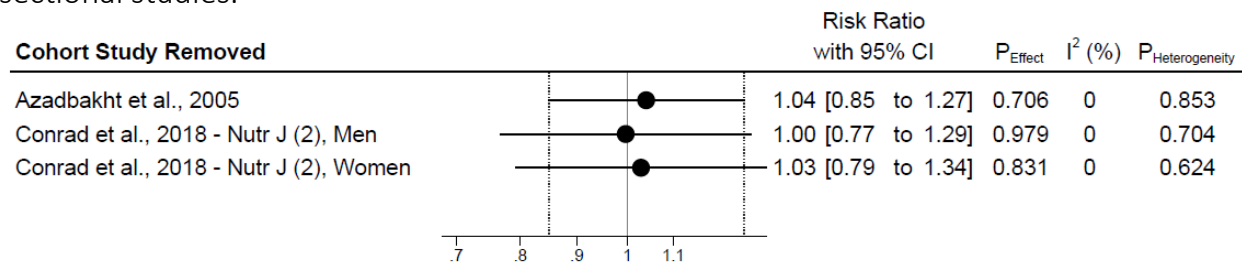

*Influence analysis: Removal of each cohort study, one at a time and recalculation of the overall effect and heterogeneity*

CI= confidence interval; I<sup>2</sup>=heterogeneity



## References

- [1] L. Azadbakht, P. Mirmiran, A. Esmailzadeh, F. Azizi, Dietary diversity score and cardiovascular risk factors in Tehranian adults, *Public Health Nutr.* 9 (2006) 728–736. <https://doi.org/10.1079/phn2005887>.
- [2] M.A. Bernstein, K.L. Tucker, N.D. Ryan, E.F. O’neill, K.M. Clements, M.E. Nelson, W.J. Evans, M.A.F. Singh, Higher dietary variety is associated with better nutritional status in frail elderly people, *J Am Diet Assoc.* 102 (2002) 1096–1104.
- [3] S.N. Bhupathiraju, K.L. Tucker, Greater variety in fruit and vegetable intake is associated with lower inflammation in Puerto Rican adults, *American Journal of Clinical Nutrition.* 93 (2011) 37–46. <https://doi.org/10.3945/ajcn.2010.29913>.
- [4] Z. Conrad, S. Raatz, L. Jahns, Greater vegetable variety and amount are associated with lower prevalence of coronary heart disease: National Health and Nutrition Examination Survey, 1999–2014, *Nutr J.* 17 (2018). <https://doi.org/10.1186/s12937-018-0376-4>.
- [5] Z. Conrad, J. Thomson, L. Jahns, Prospective analysis of vegetable amount and variety on the risk of all-cause and cause-specific mortality among US adults, 1999–2011, *Nutrients.* 10 (2018). <https://doi.org/10.3390/nu10101377>.
- [6] S.N. Bhupathiraju, N.M. Wedick, A. Pan, J.E. Manson, K.M. Rexrode, W.C. Willett, E.B. Rimm, F.B. Hu, Quantity and variety in fruit and vegetable intake and risk of coronary heart disease1–3, *American Journal of Clinical Nutrition.* 98 (2013) 1514–1523. <https://doi.org/10.3945/ajcn.113.066381>.
- [7] M. Kobayashi, S. Sasazuki, T. Shimazu, N. Sawada, T. Yamaji, M. Iwasaki, T. Mizoue, S. Tsugane, Association of dietary diversity with total mortality and major causes of mortality in the Japanese population: JPHC study, *Eur J Clin Nutr.* 74 (2020) 54–66. <https://doi.org/10.1038/s41430-019-0416-y>.
- [8] M.J.E. Lamb, S.J. Griffin, S.J. Sharp, A.J.M. Cooper, Fruit and vegetable intake and cardiovascular risk factors in people with newly diagnosed type 2 diabetes, *Eur J Clin Nutr.* 71 (2017) 115–121. <https://doi.org/10.1038/ejcn.2016.180>.
- [9] L. López-González, N. Becerra-Tomás, N. Babio, M.Á. Martínez-González, S.K. Nishi, D. Corella, A. Goday, D. Romaguera, J. Vioque, Á.M. Alonso-Gómez, J. Wärnberg, J.A. Martínez, L. Serra-Majem, R. Estruch, M.R. Bernal-López, J. Lapetra, X. Pintó, J.A. Tur, J. López-Miranda, A. Bueno-Cavanillas, M. Delgado-Rodríguez, P. Matía-Martín, L. Daimiel, V. Martín-Sánchez, J. Vidal, C. Vázquez, E. Ros, Z. Vázquez-Ruiz, F.M. Martín-Luján, J. V. Sorlí, O. Castañer, M.A. Zulet, L. Tojal-Sierra, R. Carabaño-Moral, J. Román-Maciá, E. Rayó, A. García-Ríos, R. Casas, A.M. Gómez-Pérez, J.M. Santos-Lozano, P. Buil-Cosiales, E.M. Asensio, C. Lassale, I. Abete, I. Salaverria-Lete, C. Sayón-Orea, H. Schröder, J. Salas-Salvadó, One-year changes in fruit and vegetable variety intake and cardiometabolic risk factors changes in a middle-aged Mediterranean population at high cardiovascular risk, *Eur J Clin Nutr.* (2022). <https://doi.org/10.1038/s41430-022-01124-3>.
- [10] L.M. Oude Griep, W.M.M. Verschuren, D. Kromhout, M.C. Ocké, J.M. Geleijnse, Variety in fruit and vegetable consumption and 10-year incidence of CHD and stroke, *Public Health Nutr.* 15 (2012) 2280–2286. <https://doi.org/10.1017/S1368980012000912>.
- [11] S. Yeung, Z. Zhu, R. Chan, T. Kwok, J. Woo, Prospective analysis of fruit and vegetable variety on health outcomes in community-dwelling Chinese older adults, *J Nutr Health Aging.* (2021).

- [12] C.P. Cannon, M.A. Blazing, R.P. Giugliano, A. McCagg, J.A. White, P. Theroux, H. Darius, B.S. Lewis, T.O. Ophuis, J.W. Jukema, G.M. De Ferrari, W. Ruzyllo, P. De Lucca, K. Im, E.A. Bohula, C. Reist, S.D. Wiviott, A.M. Tershakovec, T.A. Musliner, E. Braunwald, R.M. Califf, Ezetimibe Added to Statin Therapy after Acute Coronary Syndromes, *New England Journal of Medicine*. 372 (2015) 2387–2397. <https://doi.org/10.1056/nejmoa1410489>.
- [13] Cholesterol Treatment Trialists' (CTT) Collaboration, Efficacy and safety of more intensive lowering of LDL cholesterol: a meta-analysis of data from 170 000 participants in 26 randomised trials, *The Lancet*. 376 (2010) 1670–1681. [https://doi.org/10.1016/S0140-6736\(10\)61350-5](https://doi.org/10.1016/S0140-6736(10)61350-5).
- [14] F.L.J. Visseren, F. Mach, Y.M. Smulders, D. Carballo, K.C. Koskinas, M. Bäck, A. Benetos, A. Biffi, J.-M. Boavida, D. Capodanno, B. Cosyns, C. Crawford, C.H. Davos, I. Desormais, E. Di Angelantonio, O.H. Franco, S. Halvorsen, F.D.R. Hobbs, M. Hollander, E.A. Jankowska, M. Michal, S. Sacco, N. Sattar, L. Tokgozoglu, S. Tonstad, K.P. Tsoufis, I. van Dis, I.C. van Gelder, C. Wanner, B. Williams, G. De Backer, V. Regitz-Zagrosek, A.H. Aamodt, M. Abdelhamid, V. Aboyans, C. Albus, R. Asteggiano, M. Bäck, M.A. Borger, C. Brotons, J. Čelutkienė, R. Cifkova, M. Cikes, F. Cosentino, N. Dagres, T. De Backer, D. De Bacquer, V. Delgado, H. Den Ruijter, P. Dendale, H. Drexel, V. Falk, L. Fauchier, B.A. Ference, J. Ferrières, M. Ferrini, M. Fisher, D. Fliser, Z. Fras, D. Gaita, S. Giampaoli, S. Gielen, I. Graham, C. Jennings, T. Jorgensen, A. Kautzky-Willer, M. Kavousi, W. Koenig, A. Konradi, D. Kotecha, U. Landmesser, M. Lettino, B.S. Lewis, A. Linhart, M.-L. Løchen, K. Makrilakis, G. Mancia, P. Marques-Vidal, J.W. McEvoy, P. McGreavy, B. Merkely, L. Neubeck, J.C. Nielsen, J. Perk, S.E. Petersen, A.S. Petronio, M. Piepoli, N.G. Pogosova, E.I.B. Prescott, K.K. Ray, Z. Reiner, D.J. Richter, L. Rydén, E. Shlyakhto, M. Sitges, M. Sousa-Uva, I. Sudano, M. Tiberi, R.M. Touyz, A. Ungar, W.M.M. Verschuren, O. Wiklund, D. Wood, J.L. Zamorano, Y.M. Smulders, D. Carballo, K.C. Koskinas, M. Bäck, A. Benetos, A. Biffi, J.-M. Boavida, D. Capodanno, B. Cosyns, C.A. Crawford, C.H. Davos, I. Desormais, E. Di Angelantonio, O.H. Franco Duran, S. Halvorsen, F.D. Richard Hobbs, M. Hollander, E.A. Jankowska, M. Michal, S. Sacco, N. Sattar, L. Tokgozoglu, S. Tonstad, K.P. Tsoufis, I. van Dis, I.C. van Gelder, C. Wanner, B. Williams, 2021 ESC Guidelines on cardiovascular disease prevention in clinical practice, *Eur Heart J*. 42 (2021) 3227–3337. <https://doi.org/10.1093/eurheartj/ehab484>.
- [15] Prospective Studies Collaboration, Age-specific relevance of usual blood pressure to vascular mortality: a meta-analysis of individual data for one million adults in 61 prospective studies, *The Lancet*. 360 (2002) 1903–1913. [https://doi.org/10.1016/S0140-6736\(02\)11911-8](https://doi.org/10.1016/S0140-6736(02)11911-8).
- [16] E. Medicines Agency, Committee for Medicinal Products for Human Use (CHMP) 3 Guideline on clinical investigation of medicinal products in, 2018. [www.ema.europa.eu/contact](http://www.ema.europa.eu/contact).
- [17] R. Borg, J.C. Kuenen, B. Carstensen, H. Zheng, D.M. Nathan, R.J. Heine, J. Nerup, K. Borch-Johnsen, D.R. Witte, Associations between features of glucose exposure and A1C: The A1C-Derived Average Glucose (ADAG) study, *Diabetes*. 59 (2010) 1585–1590. <https://doi.org/10.2337/db09-1774>.
- [18] L. Ge, B. Sadeghirad, G.D.C. Ball, B.R. da Costa, C.L. Hitchcock, A. Svendrovski, R. Kiflen, K. Quadri, H.Y. Kwon, M. Karamouzian, T. Adams-Webber, W. Ahmed, S. Damanhoury, D. Zeraatkar, A. Nikolakopoulou, R.T. Tsuyuki, J. Tian, K. Yang, G.H.

- Guyatt, B.C. Johnston, Comparison of dietary macronutrient patterns of 14 popular named dietary programmes for weight and cardiovascular risk factor reduction in adults: systematic review and network meta-analysis of randomised trials, *BMJ*. (2020) m696. <https://doi.org/10.1136/bmj.m696>.
- [19] B.C. Johnston, S. Kanter, K. Bandayrel, P. Wu, F. Naji, R.A. Siemieniuk, G.D.C. Ball, J.W. Busse, K. Thorlund, G. Guyatt, J.P. Jansen, E.J. Mills, Comparison of weight loss among named diet programs in overweight and obese adults: A meta-analysis, *JAMA*. 312 (2014) 923–933. <https://doi.org/10.1001/jama.2014.10397>.
  - [20] Reynolds Risk Score: Calculating Heart and Stroke Risk for Women and Men, (n.d.). <http://www.reynoldsriskscore.org/> (accessed May 27, 2023).
  - [21] P.M. Ridker, N.P. Paynter, N. Rifai, J.M. Gaziano, N.R. Cook, C-reactive protein and parental history improve global cardiovascular risk prediction: The Reynolds risk score for men, *Circulation*. 118 (2008) 2243–2251. <https://doi.org/10.1161/CIRCULATIONAHA.108.814251>.
  - [22] P.M. Ridker, J.E. Buring, N. Rifai, N.R. Cook, Development and Validation of Improved Algorithms for the Assessment of Global Cardiovascular Risk in Women The Reynolds Risk Score, n.d. <https://jamanetwork.com/>.
  - [23] Canadian Cardiovascular Society, Framingham Risk Score (FRS), (2017). [https://ccs.ca/app/uploads/2020/12/FRS\\_eng\\_2017\\_fnl1.pdf](https://ccs.ca/app/uploads/2020/12/FRS_eng_2017_fnl1.pdf) (accessed May 27, 2023).
  - [24] N. Santesso, C. Glenton, P. Dahm, P. Garner, E.A. Akl, B. Alper, R. Brignardello-Petersen, A. Carrasco-Labra, H. De Beer, M. Hultcrantz, T. Kuijpers, J. Meerpohl, R. Morgan, R. Mustafa, N. Skoetz, S. Sultan, C. Wiysonge, G. Guyatt, H.J. Schünemann, GRADE Working Group, GRADE guidelines 26: informative statements to communicate the findings of systematic reviews of interventions., *J Clin Epidemiol*. 119 (2020) 126–135. <https://doi.org/10.1016/j.jclinepi.2019.10.014>.
  - [25] H.J. Schünemann, W. Wiercioch, J. Brozek, I. Etzeandía-Ikobaltzeta, R.A. Mustafa, V. Manja, R. Brignardello-Petersen, I. Neumann, M. Falavigna, W. Alhazzani, N. Santesso, Y. Zhang, J.J. Meerpohl, R.L. Morgan, B. Rochwerf, A. Darzi, M.X. Rojas, A. Carrasco-Labra, Y. Adi, Z. AlRayees, J. Riva, C. Bollig, A. Moore, J.J. Yepes-Núñez, C. Cuello, R. Waziry, E.A. Akl, GRADE Evidence to Decision (EtD) frameworks for adoption, adaptation, and de novo development of trustworthy recommendations: GRADE-ADOLOPMENT, *J Clin Epidemiol*. 81 (2017) 101–110. <https://doi.org/10.1016/j.jclinepi.2016.09.009>.
  - [26] H. Balshem, M. Helfand, H.J. Schünemann, A.D. Oxman, R. Kunz, J. Brozek, G.E. Vist, Y. Falck-Ytter, J. Meerpohl, S. Norris, G.H. Guyatt, GRADE guidelines: 3. Rating the quality of evidence, *J Clin Epidemiol*. 64 (2011) 401–406. <https://doi.org/10.1016/j.jclinepi.2010.07.015>.
